# Supplementary material for: The Process of Digitalization of the Urban Environment for the Development of Sustainable and Circular Cities: A Case Study of Bologna, Italy
Source: MDPI journal article supplement (doi:10.3390/su142113740), 2022-10-24
Supplement: s1 [file s1]

| Urban Block<br>"ID Code" | Total Built<br>Area <sup>(1)</sup> | Built Area<br>Main<br>Buildings <sup>(2)</sup> | Built Area<br>Service<br>Buildings <sup>(2)</sup> | Total Built<br>Area <sup>(2)</sup> | Total Built<br>Volume <sup>(1)</sup> | Built Volume<br>Main<br>Buildings <sup>(2)</sup> | Built Volume<br>Service<br>Buildings <sup>(2)</sup> | Total Built<br>Volume <sup>(2)</sup> | Average<br>Height <sup>(1)</sup> | Maximum<br>Height <sup>(1)</sup> | Average<br>Height Main<br>Buildings <sup>(2)</sup> | Average<br>Height Service<br>Buildings <sup>(2)</sup> | Average<br>Floors<br>Number <sup>(1)</sup> | Average<br>Number of<br>Floors <sup>(2)</sup> | Average<br>Number of<br>Residential<br>Floors <sup>(2)</sup> | Average Height                  |                | Average Floors Number           |                |
|--------------------------|------------------------------------|------------------------------------------------|---------------------------------------------------|------------------------------------|--------------------------------------|--------------------------------------------------|-----------------------------------------------------|--------------------------------------|----------------------------------|----------------------------------|----------------------------------------------------|-------------------------------------------------------|--------------------------------------------|-----------------------------------------------|--------------------------------------------------------------|---------------------------------|----------------|---------------------------------|----------------|
|                          |                                    |                                                |                                                   |                                    |                                      |                                                  |                                                     |                                      |                                  |                                  |                                                    |                                                       |                                            |                                               |                                                              | Variation<br>Absolute<br>values | Variation<br>% | Variation<br>Absolute<br>values | Variation<br>% |
| 5                        | 3,934                              | 3,735                                          | 200                                               | 3,934                              | 66,262                               | 65,445                                           | 816                                                 | 66,262                               | 14.63                            | 24.20                            | 16.80                                              | 3.60                                                  | 4.00                                       | 4.00                                          | 4.00                                                         | -2.175                          | -14.87%        | -0.600                          | -15.00%        |
| 12                       | 5,589                              | 5,091                                          | 498                                               | 5,589                              | 111,686                              | 109,476                                          | 2,210                                               | 111,686                              | 11.26                            | 20.10                            | 17.19                                              | 6.80                                                  | 3.00                                       | 4.89                                          | 4.67                                                         | -5.929                          | -52.65%        | -1.889                          | -62.96%        |
| 13                       | 4,898                              | 4,457                                          | 441                                               | 4,898                              | 75,773                               | 74,363                                           | 1,411                                               | 75,773                               | 15.65                            | 19.20                            | 17.68                                              | 3.27                                                  | 4.00                                       | 4.89                                          | 4.78                                                         | -2.035                          | -13.01%        | -0.890                          | -22.25%        |
| 16                       | 4,473                              | 3,957                                          | 516                                               | 4,473                              | 42,661                               | 39,812                                           | 2,849                                               | 42,661                               | 9.41                             | 13.70                            | 10.97                                              | 3.58                                                  | 3.00                                       | 3.10                                          | 2.70                                                         | -1.567                          | -16.66%        | -0.100                          | -3.33%         |
| 29                       | 7,144                              | 5,804                                          | 1,340                                             | 7,144                              | 145,976                              | 140,925                                          | 5,050                                               | 145,976                              | 21.85                            | 32.00                            | 21.05                                              | 4.20                                                  | 6.00                                       | 5.85                                          | 4.92                                                         | 0.798                           | 3.65%          | 0.154                           | 2.56%          |
| 31                       | 4,321                              | 3,946                                          | 375                                               | 4,321                              | 62,784                               | 59,026                                           | 3,758                                               | 62,784                               | 13.01                            | 20.90                            | 14.09                                              | 9.95                                                  | 4.00                                       | 3.71                                          | 3.71                                                         | -1.081                          | -8.31%         | 0.294                           | 7.35%          |
| 41                       | 6,344                              | 5,465                                          | 879                                               | 6,344                              | 101,131                              | 96,882                                           | 4,250                                               | 101,131                              | 16.89                            | 27.70                            | 17.60                                              | 4.37                                                  | 5.00                                       | 5.00                                          | 4.75                                                         | -0.712                          | -4.22%         | 0.000                           | 0.00%          |
| 50                       | 5,271                              | 4,576                                          | 696                                               | 5,271                              | 93,767                               | 90,938                                           | 2,828                                               | 93,767                               | 16.01                            | 25.00                            | 19.18                                              | 3.30                                                  | 5.00                                       | 5.29                                          | 5.00                                                         | -3.176                          | -19.84%        | -0.290                          | -5.80%         |
| 52                       | 6,636                              | 6,319                                          | 317                                               | 6,636                              | 115,932                              | 114,938                                          | 994                                                 | 115,932                              | 14.92                            | 19.70                            | 18.05                                              | 3.12                                                  | 4.00                                       | 5.00                                          | 4.80                                                         | -3.137                          | -21.03%        | -1.000                          | -25.00%        |
| 70                       | 5,033                              | 4,699                                          | 334                                               | 5,033                              | 90,096                               | 89,429                                           | 667                                                 | 90,096                               | 11.33                            | 21.60                            | 19.23                                              | 2.18                                                  | 3.00                                       | 5.88                                          | 5.63                                                         | -7.903                          | -69.77%        | -2.880                          | -96.00%        |
| 86                       | 5,097                              | 4,042                                          | 1,055                                             | 5,097                              | 71,978                               | 68,345                                           | 3,633                                               | 71,978                               | 11.32                            | 17.90                            | 16.75                                              | 3.40                                                  | 3.00                                       | 4.67                                          | 4.50                                                         | -5.430                          | -47.97%        | -1.667                          | -55.56%        |
| 107                      | 9,078                              | 8,562                                          | 516                                               | 9,078                              | 98,855                               | 96,321                                           | 2,534                                               | 98,855                               | 10.25                            | 27.00                            | 14.69                                              | 3.75                                                  | 3.00                                       | 4.77                                          | 4.05                                                         | -4.438                          | -43.29%        | -1.773                          | -59.09%        |
| 108                      | 4,645                              | 4,110                                          | 534                                               | 4,645                              | 76,924                               | 75,588                                           | 1,336                                               | 76,924                               | 19.61                            | 30.90                            | 19.20                                              | 2.50                                                  | 6.00                                       | 5.67                                          | 5.00                                                         | 0.408                           | 2.08%          | 0.333                           | 5.56%          |
| 117                      | 9,709                              | 9,118                                          | 591                                               | 9,709                              | 154,427                              | 152,979                                          | 1,449                                               | 154,427                              | 11.03                            | 19.70                            | 16.68                                              | 2.39                                                  | 3.00                                       | 4.58                                          | 4.50                                                         | -5.649                          | -51.22%        | -1.577                          | -52.56%        |
| 130                      | 4,507                              | 4,151                                          | 356                                               | 4,507                              | 71,511                               | 70,542                                           | 969                                                 | 71,511                               | 14.30                            | 19.80                            | 17.15                                              | 2.60                                                  | 4.00                                       | 5.00                                          | 4.36                                                         | -2.858                          | -19.99%        | -1.000                          | -25.00%        |
| 144                      | 4,743                              | 4,286                                          | 457                                               | 4,743                              | 68,171                               | 65,494                                           | 2,677                                               | 68,171                               | 9.99                             | 16.00                            | 15.34                                              | 6.25                                                  | 3.00                                       | 4.14                                          | 4.14                                                         | -5.349                          | -53.54%        | -1.143                          | -38.10%        |
| 149                      | 4,441                              | 3,697                                          | 745                                               | 4,441                              | 60,090                               | 57,785                                           | 2,305                                               | 60,090                               | 9.68                             | 21.30                            | 16.19                                              | 3.61                                                  | 3.00                                       | 4.40                                          | 4.00                                                         | -6.503                          | -67.16%        | -1.400                          | -46.67%        |
| 189                      | 4,133                              | 4,106                                          | 28                                                | 4,133                              | 89,786                               | 89,786                                           | 0                                                   | 89,786                               | 15.55                            | 21.50                            | 16.37                                              | 0.00                                                  | 4.00                                       | 4.33                                          | 4.00                                                         | -0.820                          | -5.27%         | -0.330                          | -8.25%         |
| 273                      | 5,204                              | 4,477                                          | 728                                               | 5,204                              | 88,076                               | 85,587                                           | 2,489                                               | 88,076                               | 13.87                            | 21.50                            | 18.61                                              | 3.54                                                  | 4.00                                       | 5.10                                          | 4.70                                                         | -4.742                          | -34.19%        | -1.100                          | -27.50%        |
| 279                      | 9,242                              | 7,029                                          | 2,213                                             | 9,242                              | 194,438                              | 183,743                                          | 10,696                                              | 194,438                              | 21.91                            | 28.70                            | 27.68                                              | 5.74                                                  | 6.00                                       | 7.09                                          | 6.09                                                         | -5.766                          | -26.31%        | -1.090                          | -18.17%        |
| permits                  |                                    |                                                |                                                   |                                    |                                      |                                                  |                                                     |                                      |                                  |                                  |                                                    |                                                       |                                            |                                               |                                                              | MAX                             | -69.77%        | MAX                             | -96.00%        |
| geodatabase              |                                    |                                                |                                                   |                                    |                                      |                                                  |                                                     |                                      |                                  |                                  |                                                    |                                                       |                                            |                                               |                                                              | MIN                             | 3.65%          | MIN                             | 7.35%          |
|                          |                                    |                                                |                                                   |                                    |                                      |                                                  |                                                     |                                      |                                  |                                  |                                                    |                                                       |                                            |                                               | Average                                                      | -28.88%                         | Average        | -27.93%                         |                |

|                       |                  |                                                  |                                         |                                            |                           |                          |                                                |                                                |                                                 |                                               |                                               | FSI                       |             | Number of Buildings/Polygons |             | OSR                       |             |         |
|-----------------------|------------------|--------------------------------------------------|-----------------------------------------|--------------------------------------------|---------------------------|--------------------------|------------------------------------------------|------------------------------------------------|-------------------------------------------------|-----------------------------------------------|-----------------------------------------------|---------------------------|-------------|------------------------------|-------------|---------------------------|-------------|---------|
| Urban Block "ID Code" | Territorial Area | Number of Main Buildings without Archival Permit | Number of Main Buildings <sup>(2)</sup> | Number of Service Buildings <sup>(2)</sup> | Total Number of Buildings | Number of Polygons (GIS) | FSI <sup>(1)</sup><br><i>Floor Space Index</i> | FSI <sup>(2)</sup><br><i>Floor Space Index</i> | GSI <sup>(1)</sup><br><i>Ground Space Index</i> | OSR <sup>(1)</sup><br><i>Open Space Ratio</i> | OSR <sup>(2)</sup><br><i>Open Space Ratio</i> | Variation Absolute values | Variation % | Variation Absolute values    | Variation % | Variation Absolute values | Variation % |         |
| 5                     | 9,191            | 1                                                | 11                                      | 3                                          | 14                        | 16                       | 2.062                                          | 1.765                                          | 0.428                                           | 0.277                                         | 0.324                                         | 0.297                     | 14.38%      | 2                            | 12.50%      | -0.047                    | -16.80%     |         |
| 12                    | 15,918           | 1                                                | 9                                       | 4                                          | 13                        | 14                       | 1.617                                          | 1.571                                          | 0.351                                           | 0.401                                         | 0.415                                         | 0.046                     | 2.84%       | 1                            | 7.14%       | -0.014                    | -3.39%      |         |
| 13                    | 10,064           | 1                                                | 10                                      | 3                                          | 13                        | 22                       | 2.082                                          | 1.959                                          | 0.487                                           | 0.246                                         | 0.262                                         | 0.123                     | 5.89%       | 9                            | 40.91%      | -0.015                    | -6.26%      |         |
| 16                    | 10,196           | 6                                                | 18                                      | 5                                          | 23                        | 23                       | 1.124                                          | N.A.                                           | 0.439                                           | 0.499                                         | N.A.                                          | N.A.                      | N.A.        | 0                            | 0.00%       | N.A.                      | N.A.        |         |
| 29                    | 12,900           | 1                                                | 13                                      | 10                                         | 23                        | 31                       | 3.262                                          | 3.030                                          | 0.554                                           | 0.137                                         | 0.147                                         | 0.232                     | 7.11%       | 8                            | 25.81%      | -0.010                    | -7.66%      |         |
| 31                    | 11,540           | 2                                                | 17                                      | 6                                          | 23                        | 23                       | 1.518                                          | 1.368                                          | 0.374                                           | 0.412                                         | 0.458                                         | 0.150                     | 9.88%       | 0                            | 0.00%       | -0.045                    | -10.96%     |         |
| 41                    | 11,823           | 5                                                | 9                                       | 3                                          | 12                        | 24                       | 2.440                                          | N.A.                                           | 0.537                                           | 0.190                                         | N.A.                                          | N.A.                      | N.A.        | 12                           | 50.00%      | N.A.                      | N.A.        |         |
| 50                    | 13,100           | 2                                                | 14                                      | 6                                          | 20                        | 30                       | 2.012                                          | 1.848                                          | 0.402                                           | 0.297                                         | 0.324                                         | 0.164                     | 8.16%       | 10                           | 33.33%      | -0.026                    | -8.89%      |         |
| 52                    | 15,418           | 0                                                | 15                                      | 5                                          | 20                        | 19                       | 2.106                                          | 2.065                                          | 0.430                                           | 0.271                                         | 0.276                                         | 0.041                     | 1.96%       | -1                           | -5.26%      | -0.005                    | -2.00%      |         |
| 70                    | 10,815           | 0                                                | 8                                       | 7                                          | 15                        | 15                       | 2.334                                          | 2.198                                          | 0.465                                           | 0.229                                         | 0.243                                         | 0.136                     | 5.83%       | 0                            | 0.00%       | -0.014                    | -6.19%      |         |
| 86                    | 9,226            | 1                                                | 6                                       | 3                                          | 9                         | 10                       | 2.189                                          | 2.073                                          | 0.553                                           | 0.204                                         | 0.216                                         | 0.116                     | 5.30%       | 1                            | 10.00%      | -0.011                    | -5.59%      |         |
| 107                   | 19,505           | 8                                                | 23                                      | 2                                          | 25                        | 32                       | 1.445                                          | N.A.                                           | 0.414                                           | 0.406                                         | N.A.                                          | N.A.                      | N.A.        | 7                            | 21.88%      | N.A.                      | N.A.        |         |
| 108                   | 9,442            | 4                                                | 10                                      | 1                                          | 11                        | 13                       | 2.319                                          | N.A.                                           | 0.492                                           | 0.219                                         | N.A.                                          | N.A.                      | N.A.        | 2                            | 15.38%      | N.A.                      | N.A.        |         |
| 117                   | 22,354           | 1                                                | 26                                      | 17                                         | 43                        | 43                       | 1.907                                          | 1.883                                          | 0.434                                           | 0.297                                         | 0.301                                         | 0.024                     | 1.23%       | 0                            | 0.00%       | -0.004                    | -1.25%      |         |
| 130                   | 9,617            | 1                                                | 11                                      | 7                                          | 18                        | 31                       | 2.129                                          | 2.103                                          | 0.469                                           | 0.250                                         | 0.253                                         | 0.026                     | 1.22%       | 13                           | 41.94%      | -0.003                    | -1.23%      |         |
| 144                   | 10,722           | 1                                                | 10                                      | 13                                         | 23                        | 22                       | 1.824                                          | 1.748                                          | 0.442                                           | 0.306                                         | 0.319                                         | 0.076                     | 4.19%       | -1                           | -4.55%      | -0.013                    | -4.38%      |         |
| 149                   | 10,790           | 0                                                | 14                                      | 15                                         | 29                        | 29                       | 1.533                                          | 1.525                                          | 0.412                                           | 0.384                                         | 0.386                                         | 0.008                     | 0.51%       | 0                            | 0.00%       | -0.002                    | -0.51%      |         |
| 189                   | 10,141           | 1                                                | 7                                       | 1                                          | 8                         | 12                       | 1.808                                          | 1.508                                          | 0.408                                           | 0.328                                         | 0.393                                         | 0.300                     | 16.59%      | 4                            | 33.33%      | -0.065                    | -19.89%     |         |
| 273                   | 11,836           | 0                                                | 10                                      | 5                                          | 15                        | 15                       | 2.126                                          | 1.990                                          | 0.440                                           | 0.263                                         | 0.282                                         | 0.136                     | 6.40%       | 0                            | 0.00%       | -0.019                    | -7.05%      |         |
| 279                   | 14,599           | 2                                                | 11                                      | 9                                          | 20                        | 37                       | 3.753                                          | 2.983                                          | 0.633                                           | 0.098                                         | 0.123                                         | 0.770                     | 20.51%      | 17                           | 45.95%      | -0.025                    | -25.50%     |         |
| permits               |                  |                                                  |                                         |                                            |                           |                          |                                                |                                                |                                                 |                                               |                                               |                           | MAX         | 20.51%                       | MAX         | 50.00%                    | MAX         | -25.50% |
| geodatabase           |                  |                                                  |                                         |                                            |                           |                          |                                                |                                                |                                                 |                                               |                                               |                           | MIN         | 0.51%                        | MIN         | -5.26%                    | MIN         | -0.51%  |
|                       |                  |                                                  |                                         |                                            |                           |                          |                                                |                                                |                                                 |                                               |                                               | Average                   | 7.00%       | Average                      | 16.42%      | Average                   | -7.97%      |         |

| Urban Block<br>"ID Code" | Total Built<br>Area <sup>(1)</sup> | Built Area<br>Principal<br>Buildings <sup>(2)</sup> | Built Area<br>Service<br>Buildings <sup>(2)</sup> | Total Built<br>Volume <sup>(1)</sup> | Built Volume<br>Principal<br>Buildings <sup>(2)</sup> | Built Volume<br>Service<br>Buildings <sup>(2)</sup> | permits<br>geodatabase |
|--------------------------|------------------------------------|-----------------------------------------------------|---------------------------------------------------|--------------------------------------|-------------------------------------------------------|-----------------------------------------------------|------------------------|
|                          | [m2]                               | [m2]                                                | [m2]                                              | [m3]                                 | [m3]                                                  | [m3]                                                |                        |
| 5                        | 3,934                              | 3,735                                               | 200                                               | 66,262                               | 65,445                                                | 816                                                 |                        |
| 12                       | 5,589                              | 5,091                                               | 498                                               | 111,686                              | 109,476                                               | 2,210                                               |                        |
| 13                       | 4,898                              | 4,457                                               | 441                                               | 75,773                               | 74,363                                                | 1,411                                               |                        |
| 16                       | 4,473                              | 3,957                                               | 516                                               | 42,661                               | 39,812                                                | 2,849                                               |                        |
| 29                       | 7,144                              | 5,804                                               | 1,340                                             | 145,976                              | 140,925                                               | 5,050                                               |                        |
| 31                       | 4,321                              | 3,946                                               | 375                                               | 62,784                               | 59,026                                                | 3,758                                               |                        |
| 41                       | 6,344                              | 5,465                                               | 879                                               | 101,131                              | 96,882                                                | 4,250                                               |                        |
| 50                       | 5,271                              | 4,576                                               | 696                                               | 93,767                               | 90,938                                                | 2,828                                               |                        |
| 52                       | 6,636                              | 6,319                                               | 317                                               | 115,932                              | 114,938                                               | 994                                                 |                        |
| 70                       | 5,033                              | 4,699                                               | 334                                               | 90,096                               | 89,429                                                | 667                                                 |                        |
| 86                       | 5,097                              | 4,042                                               | 1,055                                             | 71,978                               | 68,345                                                | 3,633                                               |                        |
| 107                      | 9,078                              | 8,562                                               | 516                                               | 98,855                               | 96,321                                                | 2,534                                               |                        |
| 108                      | 4,645                              | 4,110                                               | 534                                               | 76,924                               | 75,588                                                | 1,336                                               |                        |
| 117                      | 9,709                              | 9,118                                               | 591                                               | 154,427                              | 152,979                                               | 1,449                                               |                        |
| 130                      | 4,507                              | 4,151                                               | 356                                               | 71,511                               | 70,542                                                | 969                                                 |                        |
| 144                      | 4,743                              | 4,286                                               | 457                                               | 68,171                               | 65,494                                                | 2,677                                               |                        |
| 149                      | 4,441                              | 3,697                                               | 745                                               | 60,090                               | 57,785                                                | 2,305                                               |                        |
| 189                      | 4,133                              | 4,106                                               | 28                                                | 89,786                               | 89,786                                                | 0                                                   |                        |
| 273                      | 5,204                              | 4,477                                               | 728                                               | 88,076                               | 85,587                                                | 2,489                                               |                        |
| 279                      | 9,242                              | 7,029                                               | 2,213                                             | 194,438                              | 183,743                                               | 10,696                                              |                        |

| Urban Block<br>"ID Code" | Average<br>Height <sup>(1)</sup> | Maximum<br>Height <sup>(1)</sup> | Average<br>Height<br>Principal<br>Buildings <sup>(2)</sup> | Average<br>Height<br>Service<br>Buildings <sup>(2)</sup> | Average<br>Floors<br>Number <sup>(1)</sup> | Average<br>Number of<br>Floors <sup>(2)</sup> | Average<br>Number of<br>Residential<br>Floors <sup>(2)</sup> | Underground Floor<br>[yes/no] |     |      | Pitched Roof / Flat<br>Roof |      |      | Ground Floor: Main Use |     |       |     |      | Building Type |      |     |                 | Vertical Load-bearing<br>Structure |      |     |      |     |   |
|--------------------------|----------------------------------|----------------------------------|------------------------------------------------------------|----------------------------------------------------------|--------------------------------------------|-----------------------------------------------|--------------------------------------------------------------|-------------------------------|-----|------|-----------------------------|------|------|------------------------|-----|-------|-----|------|---------------|------|-----|-----------------|------------------------------------|------|-----|------|-----|---|
|                          | [m]                              | [m]                              | [m]                                                        | [m]                                                      | [no.]                                      | [no.]                                         | [no.]                                                        | YES                           | NO  | N.A. | PR                          | FR   | N.A. | R                      | RT  | RP    | TP  | N.A. | MD            | MR   | MCR | N.A.            | M                                  | RC   | MRC | N.A. |     |   |
| 5                        | 14.63                            | 24.20                            | 16.80                                                      | 3.60                                                     | 4.00                                       | 4.60                                          | 4.00                                                         | 54%                           | 36% | 9%   | 82%                         | 9%   | 9%   | 18%                    | 36% | 0%    | 36% | 9%   | 0%            | 91%  | 0%  | 9%              | 18%                                | 0%   | 73% | 9%   |     |   |
| 12                       | 11.26                            | 20.10                            | 17.19                                                      | 6.80                                                     | 3.00                                       | 4.89                                          | 4.67                                                         | 89%                           | 0%  | 11%  | 100%                        | 0%   | 0%   | 78%                    | 11% | 0%    | 0%  | 11%  | 0%            | 89%  | 0%  | 11%             | 56%                                | 11%  | 22% | 11%  |     |   |
| 13                       | 15.65                            | 19.20                            | 17.68                                                      | 3.27                                                     | 4.00                                       | 4.89                                          | 4.78                                                         | 60%                           | 30% | 10%  | 80%                         | 20%  | 0%   | 70%                    | 20% | 0%    | 0%  | 10%  | 70%           | 20%  | 0%  | 0%              | 60%                                | 0%   | 30% | 10%  |     |   |
| 16                       | 9.41                             | 13.70                            | 10.97                                                      | 3.58                                                     | 3.00                                       | 3.10                                          | 2.70                                                         | 50%                           | 6%  | 44%  | 50%                         | 6%   | 44%  | 39%                    | 11% | 0%    | 6%  | 44%  | 0%            | 56%  | 0%  | 44%             | 56%                                | 0%   | 0%  | 44%  |     |   |
| 29                       | 21.85                            | 32.00                            | 21.05                                                      | 4.20                                                     | 6.00                                       | 5.85                                          | 4.92                                                         | 92%                           | 0%  | 8%   | 38%                         | 62%  | 0%   | 31%                    | 8%  | 0%    | 62% | 0%   | 0%            | 92%  | 0%  | 8%              | 0%                                 | 77%  | 15% | 8%   |     |   |
| 31                       | 13.01                            | 20.90                            | 14.09                                                      | 9.95                                                     | 4.00                                       | 3.71                                          | 3.71                                                         | 78%                           | 0%  | 22%  | 67%                         | 33%  | 0%   | 100%                   | 0%  | 0%    | 0%  | 0%   | 78%           | 0%   | 0%  | 22%             | 56%                                | 0%   | 22% | 22%  |     |   |
| 41                       | 16.89                            | 27.70                            | 17.60                                                      | 4.37                                                     | 5.00                                       | 5.00                                          | 4.75                                                         | 44%                           | 0%  | 56%  | 56%                         | 44%  | 0%   | 33%                    | 0%  | 0%    | 56% | 11%  | 0%            | 44%  | 0%  | 56%             | 0%                                 | 0%   | 44% | 56%  |     |   |
| 50                       | 16.01                            | 25.00                            | 19.18                                                      | 3.30                                                     | 5.00                                       | 5.29                                          | 5.00                                                         | 93%                           | 7%  | 0%   | 64%                         | 36%  | 0%   | 71%                    | 14% | 14%   | 0%  | 0%   | 7%            | 79%  | 0%  | 0%              | 57%                                | 29%  | 14% | 0%   |     |   |
| 52                       | 14.92                            | 19.70                            | 18.05                                                      | 3.12                                                     | 4.00                                       | 5.00                                          | 4.80                                                         | 100%                          | 0%  | 0%   | 100%                        | 0%   | 0%   | 80%                    | 20% | 0%    | 0%  | 0%   | 86%           | 7%   | 7%  | 0%              | 67%                                | 7%   | 27% | 0%   |     |   |
| 70                       | 11.33                            | 21.60                            | 19.23                                                      | 2.18                                                     | 3.00                                       | 5.88                                          | 5.63                                                         | 100%                          | 0%  | 0%   | 100%                        | 0%   | 0%   | 63%                    | 38% | 0%    | 0%  | 0%   | 100%          | 0%   | 0%  | 25%             | 0%                                 | 75%  | 0%  |      |     |   |
| 86                       | 11.32                            | 17.90                            | 16.75                                                      | 3.40                                                     | 3.00                                       | 4.67                                          | 4.50                                                         | 100%                          | 0%  | 0%   | 100%                        | 0%   | 0%   | 17%                    | 67% | 0%    | 0%  | 17%  | 17%           | 33%  | 33% | 17%             | 17%                                | 0%   | 66% | 17%  |     |   |
| 107                      | 10.25                            | 27.00                            | 14.69                                                      | 3.75                                                     | 3.00                                       | 4.77                                          | 4.05                                                         | 62%                           | 0%  | 38%  | 62%                         | 48%  | 0%   | 24%                    | 0%  | 0%    | 38% | 38%  | 0%            | 62%  | 0%  | 38%             | 10%                                | 52%  | 0%  | 38%  |     |   |
| 108                      | 19.61                            | 30.90                            | 19.20                                                      | 2.50                                                     | 6.00                                       | 5.67                                          | 5.00                                                         | 50%                           | 10% | 40%  | 40%                         | 20%  | 40%  | 20%                    | 10% | 0%    | 30% | 40%  | 0%            | 100% | 0%  | 40%             | 0%                                 | 20%  | 40% | 40%  |     |   |
| 117                      | 11.03                            | 19.70                            | 16.68                                                      | 2.39                                                     | 3.00                                       | 4.58                                          | 4.50                                                         | 81%                           | 15% | 4%   | 100%                        | 0%   | 0%   | 8%                     | 88% | 0%    | 0%  | 4%   | 77%           | 19%  | 0%  | 4%              | 15%                                | 62%  | 19% | 4%   |     |   |
| 130                      | 14.30                            | 19.80                            | 17.15                                                      | 2.60                                                     | 4.00                                       | 5.00                                          | 4.36                                                         | 100%                          | 0%  | 0%   | 73%                         | 27%  | 0%   | 82%                    | 9%  | 0%    | 9%  | 0%   | 100%          | 0%   | 0%  | 0%              | 0%                                 | 82%  | 9%  | 9%   |     |   |
| 144                      | 9.99                             | 16.00                            | 15.34                                                      | 6.25                                                     | 3.00                                       | 4.14                                          | 4.14                                                         | 90%                           | 0%  | 10%  | 100%                        | 0%   | 0%   | 50%                    | 40% | 10%   | 0%  | 0%   | 30%           | 30%  | 30% | 10%             | 80%                                | 10%  | 0%  | 10%  |     |   |
| 149                      | 9.68                             | 21.30                            | 16.19                                                      | 3.61                                                     | 3.00                                       | 4.40                                          | 4.00                                                         | 100%                          | 0%  | 0%   | 57%                         | 43%  | 0%   | 57%                    | 36% | 7%    | 0%  | 0%   | 43%           | 57%  | 0%  | 0%              | 29%                                | 57%  | 14% | 0%   |     |   |
| 189                      | 15.55                            | 21.50                            | 16.37                                                      | 0.00                                                     | 4.00                                       | 4.33                                          | 4.00                                                         | 86%                           | 0%  | 14%  | 86%                         | 0%   | 14%  | 71%                    | 14% | 0%    | 0%  | 14%  | 0%            | 86%  | 0%  | 14%             | 43%                                | 0%   | 43% | 14%  |     |   |
| 273                      | 13.87                            | 21.50                            | 18.61                                                      | 3.54                                                     | 4.00                                       | 5.10                                          | 4.70                                                         | 100%                          | 0%  | 0%   | 100%                        | 0%   | 0%   | 60%                    | 40% | 0%    | 0%  | 0%   | 40%           | 10%  | 50% | 0%              | 50%                                | 0%   | 50% | 0%   |     |   |
| 279                      | 21.91                            | 28.70                            | 27.68                                                      | 5.74                                                     | 6.00                                       | 7.09                                          | 6.09                                                         | 92%                           | 0%  | 18%  | 0%                          | 100% | 0%   | 9%                     | 0%  | 0%    | 73% | 18%  | 0%            | 82%  | 0%  | 18%             | 0%                                 | 27%  | 55% | 0%   |     |   |
|                          |                                  |                                  |                                                            |                                                          |                                            |                                               |                                                              | 95%                           | 0%  | 5%   | 85%                         | 10%  | 5%   | 60%                    | 10% | 5%    | 25% |      | 25%           | 60%  | 5%  | 10%             | 40%                                | 25%  | 30% | 5%   |     |   |
|                          |                                  |                                  |                                                            |                                                          |                                            |                                               |                                                              | YES                           | NO  | N.A. | PR                          | FR   | N.A. | R                      | RT  | RT=TP | TP  |      | MD            | MR   | MCR | MCR=MRMCR=MR=MD |                                    |      |     |      |     |   |
|                          |                                  |                                  |                                                            |                                                          |                                            |                                               |                                                              |                               |     |      |                             |      |      |                        |     |       |     |      |               |      |     |                 |                                    | M    |     | RC   | MRC | M |
|                          |                                  |                                  |                                                            |                                                          |                                            |                                               |                                                              |                               |     |      |                             |      |      |                        |     |       |     |      |               |      |     |                 |                                    | MRC= |     |      |     |   |

permits  
geodatabase

more frequent >75%  
more frequent ≤75%  
equal values

| Urban Block<br>"ID Code" | Territorial<br>Area | Principal<br>Buildings<br>without<br>Archival<br>Permit | Number of<br>Principal<br>Buildings <sup>(2)</sup> | Number of<br>Service<br>Buildings <sup>(2)</sup> | Total<br>Number of<br>Buildings | Number of<br>Polygons<br>(GIS) |             |
|--------------------------|---------------------|---------------------------------------------------------|----------------------------------------------------|--------------------------------------------------|---------------------------------|--------------------------------|-------------|
|                          | [m2]                | [no.]                                                   | [no.]                                              | [no.]                                            | [no.]                           | [no.]                          | permits     |
| 5                        | 9,191               | 1                                                       | 11                                                 | 3                                                | 14                              | 16                             | geodatabase |
| 12                       | 15,918              | 1                                                       | 9                                                  | 4                                                | 13                              | 14                             |             |
| 13                       | 10,064              | 1                                                       | 10                                                 | 3                                                | 13                              | 22                             |             |
| 16                       | 10,196              | 6                                                       | 18                                                 | 5                                                | 23                              | 23                             |             |
| 29                       | 12,900              | 1                                                       | 13                                                 | 10                                               | 23                              | 31                             |             |
| 31                       | 11,540              | 2                                                       | 17                                                 | 6                                                | 23                              | 23                             |             |
| 41                       | 11,823              | 5                                                       | 9                                                  | 3                                                | 12                              | 24                             |             |
| 50                       | 13,100              | 2                                                       | 14                                                 | 6                                                | 20                              | 30                             |             |
| 52                       | 15,418              | 0                                                       | 15                                                 | 5                                                | 20                              | 19                             |             |
| 70                       | 10,815              | 0                                                       | 8                                                  | 7                                                | 15                              | 15                             |             |
| 86                       | 9,226               | 1                                                       | 6                                                  | 3                                                | 9                               | 10                             |             |
| 107                      | 19,505              | 8                                                       | 23                                                 | 2                                                | 25                              | 32                             |             |
| 108                      | 9,442               | 4                                                       | 10                                                 | 1                                                | 11                              | 13                             |             |
| 117                      | 22,354              | 1                                                       | 26                                                 | 17                                               | 43                              | 43                             |             |
| 130                      | 9,617               | 1                                                       | 11                                                 | 7                                                | 18                              | 31                             |             |
| 144                      | 10,722              | 1                                                       | 10                                                 | 13                                               | 23                              | 22                             |             |
| 149                      | 10,790              | 0                                                       | 14                                                 | 15                                               | 29                              | 29                             |             |
| 189                      | 10,141              | 1                                                       | 7                                                  | 1                                                | 8                               | 12                             |             |
| 273                      | 11,836              | 0                                                       | 10                                                 | 5                                                | 15                              | 15                             |             |
| 279                      | 14,599              | 2                                                       | 11                                                 | 9                                                | 20                              | 37                             |             |

| Urban Block<br>"ID Code" | FSI <sup>(1)</sup><br>Floor Space<br>Index | FSI <sup>(2)</sup><br>Floor Space<br>Index | GSI <sup>(1)</sup><br>Ground Space<br>Index | OSR <sup>(1)</sup><br>Open Space<br>Ratio | OSR <sup>(2)</sup><br>Open Space<br>Ratio | L <sup>(1)</sup><br>Layers | L <sup>(2)</sup><br>Layers |
|--------------------------|--------------------------------------------|--------------------------------------------|---------------------------------------------|-------------------------------------------|-------------------------------------------|----------------------------|----------------------------|
|                          | [-]                                        | [-]                                        | [-]                                         | [-]                                       | [-]                                       | [-]                        | [-]                        |
| 5                        | 2.062                                      | 1.765                                      | 0.428                                       | 0.277                                     | 0.324                                     | 4.818                      | 4.125                      |
| 12                       | 1.617                                      | 1.571                                      | 0.351                                       | 0.401                                     | 0.415                                     | 4.606                      | 4.475                      |
| 13                       | 2.082                                      | 1.959                                      | 0.487                                       | 0.246                                     | 0.262                                     | 4.275                      | 4.023                      |
| 16                       | 1.124                                      | N.A.                                       | 0.439                                       | 0.499                                     | N.A.                                      | 2.560                      | N.A.                       |
| 29                       | 3.262                                      | 3.030                                      | 0.554                                       | 0.137                                     | 0.147                                     | 5.888                      | 5.469                      |
| 31                       | 1.518                                      | 1.368                                      | 0.374                                       | 0.412                                     | 0.458                                     | 4.059                      | 3.658                      |
| 41                       | 2.440                                      | N.A.                                       | 0.537                                       | 0.190                                     | N.A.                                      | 4.544                      | N.A.                       |
| 50                       | 2.012                                      | 1.848                                      | 0.402                                       | 0.297                                     | 0.324                                     | 5.005                      | 4.596                      |
| 52                       | 2.106                                      | 2.065                                      | 0.430                                       | 0.271                                     | 0.276                                     | 4.898                      | 4.802                      |
| 70                       | 2.334                                      | 2.198                                      | 0.465                                       | 0.229                                     | 0.243                                     | 5.019                      | 4.727                      |
| 86                       | 2.189                                      | 2.073                                      | 0.553                                       | 0.204                                     | 0.216                                     | 3.958                      | 3.749                      |
| 107                      | 1.445                                      | N.A.                                       | 0.414                                       | 0.406                                     | N.A.                                      | 3.490                      | N.A.                       |
| 108                      | 2.319                                      | N.A.                                       | 0.492                                       | 0.219                                     | N.A.                                      | 4.713                      | N.A.                       |
| 117                      | 1.907                                      | 1.883                                      | 0.434                                       | 0.297                                     | 0.301                                     | 4.394                      | 4.340                      |
| 130                      | 2.129                                      | 2.103                                      | 0.469                                       | 0.250                                     | 0.253                                     | 4.543                      | 4.487                      |
| 144                      | 1.824                                      | 1.748                                      | 0.442                                       | 0.306                                     | 0.319                                     | 4.127                      | 3.954                      |
| 149                      | 1.533                                      | 1.525                                      | 0.412                                       | 0.384                                     | 0.386                                     | 3.721                      | 3.702                      |
| 189                      | 1.808                                      | 1.508                                      | 0.408                                       | 0.328                                     | 0.393                                     | 4.436                      | 3.700                      |
| 273                      | 2.126                                      | 1.990                                      | 0.440                                       | 0.263                                     | 0.282                                     | 4.832                      | 4.523                      |
| 279                      | 3.753                                      | 2.983                                      | 0.633                                       | 0.098                                     | 0.123                                     | 5.928                      | 4.712                      |

permits  
geodatabase

permits  
geodatabase

20 100%
