# Supplementary material for: The Process of Digitalization of the Urban Environment for the Development of Sustainable and Circular Cities: A Case Study of Bologna, Italy
Source: MDPI journal article supplement (doi:10.3390/su142113740), 2022-10-24
Supplement: s1 [file s1]

| COD_UN | IND=INDUSTRIAL BUILDING |           |              |           |            |             |          |              |             | No_GB | GB=GENERIC BUILDING |              |        |             |            |
|--------|-------------------------|-----------|--------------|-----------|------------|-------------|----------|--------------|-------------|-------|---------------------|--------------|--------|-------------|------------|
|        | No_IND                  | COVER_IND | AVRG. HEIGHT | VOL_IND   | %_AREA_IND | %_AREA_1IND | %_No_IND | COVERXNF_IND | AVRG_NF_IND |       | COVER_GB            | AVRG. HEIGHT | VOL_GB | COVERXNF_GB | AVRG_NF_GB |
| 0      | 6                       | 1176.514  | 16.150       | 19720.354 | 37.70      | 6.28        | 33.333   | 385.722      |             | 4     | 12                  | 1944.292     | 10.000 | 28060.532   | 7890.895   |
| 1      | 0                       | 0.000     | 0.000        | 0.000     | 0.00       | 0.00        | 0.000    | 0.000        |             | 0     | 8                   | 4021.655     | 13.688 | 59266.042   | 17705.729  |
| 2      | 0                       | 0.000     | 0.000        | 0.000     | 0.00       | 0.00        | 0.000    | 0.000        |             | 0     | 11                  | 2024.134     | 17.355 | 33466.985   | 9634.055   |
| 3      | 2                       | 197.561   | 3.400        | 671.707   | 2.60       | 1.30        | 6.061    | 171.131      |             | 1     | 31                  | 7409.846     | 18.677 | 141788.993  | 40510.343  |
| 4      | 0                       | 0.000     | 0.000        | 0.000     | 0.00       | 0.00        | 0.000    | 0.000        |             | 0     | 23                  | 3195.680     | 16.070 | 50431.699   | 14159.557  |
| 5      | 0                       | 0.000     | 0.000        | 0.000     | 0.00       | 0.00        | 0.000    | 0.000        |             | 0     | 16                  | 3934.396     | 14.625 | 66261.715   | 18952.823  |
| 6      | 0                       | 0.000     | 0.000        | 0.000     | 0.00       | 0.00        | 0.000    | 0.000        |             | 0     | 7                   | 3475.909     | 16.086 | 56348.260   | 15062.964  |
| 7      | 0                       | 0.000     | 0.000        | 0.000     | 0.00       | 0.00        | 0.000    | 0.000        |             | 0     | 32                  | 5945.883     | 17.175 | 101268.913  | 28860.072  |
| 8      | 0                       | 0.000     | 0.000        | 0.000     | 0.00       | 0.00        | 0.000    | 0.000        |             | 0     | 15                  | 2442.800     | 24.647 | 62555.300   | 18097.046  |
| 9      | 0                       | 0.000     | 0.000        | 0.000     | 0.00       | 0.00        | 0.000    | 0.000        |             | 0     | 22                  | 3943.275     | 10.305 | 48494.918   | 13400.662  |
| 11     | 0                       | 0.000     | 0.000        | 0.000     | 0.00       | 0.00        | 0.000    | 0.000        |             | 0     | 82                  | 11121.490    | 10.840 | 135582.482  | 38845.893  |
| 12     | 0                       | 0.000     | 0.000        | 0.000     | 0.00       | 0.00        | 0.000    | 0.000        |             | 0     | 30                  | 7703.531     | 11.260 | 111686.454  | 32091.863  |
| 13     | 0                       | 0.000     | 0.000        | 0.000     | 0.00       | 0.00        | 0.000    | 0.000        |             | 0     | 22                  | 4897.774     | 15.645 | 75773.409   | 20950.700  |
| 16     | 3                       | 1207.080  | 6.733        | 7461.872  | 26.98      | 8.99        | 13.636   | 233.077      |             | 2     | 19                  | 3266.162     | 9.826  | 35198.736   | 9843.788   |
| 17     | 0                       | 0.000     | 0.000        | 0.000     | 0.00       | 0.00        | 0.000    | 0.000        |             | 0     | 35                  | 6275.938     | 13.580 | 102676.172  | 29667.886  |
| 19     | 5                       | 1277.010  | 4.800        | 6942.240  | 8.61       | 1.72        | 4.950    | 531.670      |             | 1     | 96                  | 13559.225    | 8.885  | 153370.053  | 43750.781  |
| 20     | 0                       | 0.000     | 0.000        | 0.000     | 0.00       | 0.00        | 0.000    | 0.000        |             | 0     | 42                  | 6409.149     | 15.288 | 110102.022  | 31886.821  |
| 22     | 0                       | 0.000     | 0.000        | 0.000     | 0.00       | 0.00        | 0.000    | 0.000        |             | 0     | 40                  | 7091.971     | 11.622 | 133139.871  | 37860.842  |
| 23     | 0                       | 0.000     | 0.000        | 0.000     | 0.00       | 0.00        | 0.000    | 0.000        |             | 0     | 20                  | 7267.826     | 14.980 | 158266.148  | 44761.485  |
| 24     | 0                       | 0.000     | 0.000        | 0.000     | 0.00       | 0.00        | 0.000    | 0.000        |             | 0     | 25                  | 2840.435     | 12.268 | 35407.173   | 9948.142   |
| 25     | 0                       | 0.000     | 0.000        | 0.000     | 0.00       | 0.00        | 0.000    | 0.000        |             | 0     | 30                  | 5212.284     | 11.967 | 81242.006   | 22690.134  |
| 26     | 1                       | 149.062   | 7.600        | 1132.871  | 5.48       | 5.48        | 7.143    | 298.124      |             | 2     | 13                  | 2572.653     | 16.346 | 53573.731   | 15317.152  |
| 27     | 0                       | 0.000     | 0.000        | 0.000     | 0.00       | 0.00        | 0.000    | 0.000        |             | 0     | 23                  | 2593.087     | 7.239  | 23508.378   | 6598.569   |
| 28     | 11                      | 2511.324  | 5.736        | 16342.868 | 29.45      | 2.68        | 18.966   | 19.309       |             | 1     | 47                  | 6016.012     | 9.823  | 79790.344   | 22146.647  |
| 29     | 0                       | 0.000     | 0.000        | 0.000     | 0.00       | 0.00        | 0.000    | 0.000        |             | 0     | 31                  | 7143.825     | 21.852 | 145975.597  | 42083.622  |
| 30     | 2                       | 287.740   | 2.100        | 579.433   | 8.69       | 4.34        | 14.286   | 123.186      |             | 0     | 12                  | 3021.675     | 20.542 | 50233.582   | 18572.795  |
| 31     | 0                       | 0.000     | 0.000        | 0.000     | 0.00       | 0.00        | 0.000    | 0.000        |             | 0     | 23                  | 4321.203     | 13.013 | 62784.374   | 17515.042  |
| 32     | 0                       | 0.000     | 0.000        | 0.000     | 0.00       | 0.00        | 0.000    | 0.000        |             | 0     | 27                  | 4603.831     | 16.207 | 73917.213   | 20815.101  |
| 33     | 1                       | 486.850   | 7.000        | 3407.950  | 7.57       | 7.57        | 1.923    | 973.700      |             | 2     | 51                  | 5946.806     | 12.300 | 68480.357   | 19069.030  |
| 34     | 6                       | 915.867   | 6.667        | 5927.834  | 11.64      | 1.94        | 8.108    | 384.573      |             | 2     | 68                  | 6953.401     | 10.971 | 81815.948   | 23213.600  |
| 35     | 0                       | 0.000     | 0.000        | 0.000     | 0.00       | 0.00        | 0.000    | 0.000        |             | 0     | 26                  | 3947.790     | 11.015 | 47725.350   | 12925.186  |
| 36     | 3                       | 737.953   | 4.067        | 3243.038  | 14.64      | 4.88        | 9.677    | 83.571       |             | 1     | 28                  | 4303.015     | 17.750 | 80328.689   | 22700.557  |
| 37     | 0                       | 0.000     | 0.000        | 0.000     | 0.00       | 0.00        | 0.000    | 0.000        |             | 0     | 26                  | 4385.142     | 9.681  | 54582.617   | 14570.898  |
| 38     | 0                       | 0.000     | 0.000        | 0.000     | 0.00       | 0.00        | 0.000    | 0.000        |             | 0     | 45                  | 5797.940     | 7.898  | 57131.127   | 15790.153  |
| 39     | 0                       | 0.000     | 0.000        | 0.000     | 0.00       | 0.00        | 0.000    | 0.000        |             | 0     | 23                  | 7757.521     | 28.265 | 205901.512  | 58803.786  |
| 40     | 0                       | 0.000     | 0.000        | 0.000     | 0.00       | 0.00        | 0.000    | 0.000        |             | 0     | 25                  | 3674.454     | 13.168 | 59734.501   | 16199.388  |
| 41     | 3                       | 1010.545  | 5.400        | 6313.342  | 15.93      | 5.31        | 12.500   | 740.508      |             | 2     | 21                  | 5333.070     | 18.529 | 94818.116   | 26873.057  |
| 42     | 0                       | 0.000     | 0.000        | 0.000     | 0.00       | 0.00        | 0.000    | 0.000        |             | 0     | 46                  | 10053.218    | 14.124 | 162973.605  | 46401.916  |
| 44     | 0                       | 0.000     | 0.000        | 0.000     | 0.00       | 0.00        | 0.000    | 0.000        |             | 0     | 18                  | 3559.923     | 11.661 | 52262.985   | 15869.832  |
| 46     | 0                       | 0.000     | 0.000        | 0.000     | 0.00       | 0.00        | 0.000    | 0.000        |             | 0     | 23                  | 4731.981     | 14.391 | 86204.479   | 24312.316  |
| 47     | 3                       | 761.727   | 5.300        | 3693.546  | 9.23       | 3.08        | 10.345   | 247.393      |             | 1     | 26                  | 7492.242     | 28.588 | 199639.802  | 57148.062  |
| 48     | 0                       | 0.000     | 0.000        | 0.000     | 0.00       | 0.00        | 0.000    | 0.000        |             | 0     | 36                  | 5104.469     | 12.222 | 66447.704   | 18542.072  |
| 49     | 0                       | 0.000     | 0.000        | 0.000     | 0.00       | 0.00        | 0.000    | 0.000        |             | 0     | 15                  | 3520.150     | 11.480 | 52011.455   | 14573.698  |
| 50     | 0                       | 0.000     | 0.000        | 0.000     | 0.00       | 0.00        | 0.000    | 0.000        |             | 0     | 30                  | 5271.402     | 16.007 | 93766.781   | 26358.648  |
| 51     | 0                       | 0.000     | 0.000        | 0.000     | 0.00       | 0.00        | 0.000    | 0.000        |             | 0     | 51                  | 9616.455     | 13.012 | 148487.210  | 42664.233  |
| 52     | 0                       | 0.000     | 0.000        | 0.000     | 0.00       | 0.00        | 0.000    | 0.000        |             | 0     | 19                  | 6635.531     | 14.916 | 115931.846  | 32473.895  |
| 56     | 0                       | 0.000     | 0.000        | 0.000     | 0.00       | 0.00        | 0.000    | 0.000        |             | 0     | 9                   | 2584.619     | 13.122 | 48671.844   | 14738.602  |
| 57     | 0                       | 0.000     | 0.000        | 0.000     | 0.00       | 0.00        | 0.000    | 0.000        |             | 0     | 17                  | 2488.650     | 16.788 | 41414.348   | 12204.625  |
| 58     | 0                       | 0.000     | 0.000        | 0.000     | 0.00       | 0.00        | 0.000    | 0.000        |             | 0     | 18                  | 3793.451     | 11.683 | 60558.899   | 17315.673  |
| 60     | 0                       | 0.000     | 0.000        | 0.000     | 0.00       | 0.00        | 0.000    | 0.000        |             | 0     | 17                  | 2221.694     | 7.229  | 19570.101   | 5422.361   |
| 62     | 0                       | 0.000     | 0.000        | 0.000     | 0.00       | 0.00        | 0.000    | 0.000        |             | 0     | 23                  | 4910.315     | 12.035 | 69875.916   | 20260.797  |
| 64     | 0                       | 0.000     | 0.000        | 0.000     | 0.00       | 0.00        | 0.000    | 0.000        |             | 0     | 30                  | 3899.728     | 10.730 | 53536.113   | 15291.670  |
| 67     | 0                       | 0.000     | 0.000        | 0.000     | 0.00       | 0.00        | 0.000    | 0.000        |             | 0     | 28                  | 3652.446     | 13.021 | 49750.307   | 13884.257  |
| 68     | 0                       | 0.000     | 0.000        | 0.000     | 0.00       | 0.00        | 0.000    | 0.000        |             | 0     | 20                  | 3516.934     | 12.885 | 47742.041   | 13910.583  |
| 70     | 0                       | 0.000     | 0.000        | 0.000     | 0.00       | 0.00        | 0.000    | 0.000        |             | 0     | 15                  | 5033.150     | 11.327 | 90095.939   | 25238.242  |

| COD_UN | IND=INDUSTRIAL BUILDING |           |              |           |            |             |          |              |             | No_GB | GB=GENERIC BUILDING |              |        |             |            |
|--------|-------------------------|-----------|--------------|-----------|------------|-------------|----------|--------------|-------------|-------|---------------------|--------------|--------|-------------|------------|
|        | No_IND                  | COVER_IND | AVRG. HEIGHT | VOL_IND   | %_AREA_IND | %_AREA_1IND | %_No_IND | COVERXNF_IND | AVRG_NF_IND |       | COVER_GB            | AVRG. HEIGHT | VOL_GB | COVERXNF_GB | AVRG_NF_GB |
| 71     | 1                       | 415.128   | 8.000        | 3321.696  | 11.03      | 11.03       | 4.167    | 830.256      |             | 2     | 23                  | 3347.583     | 8.387  | 47561.689   | 13449.069  |
| 73     | 1                       | 324.458   | 6.100        | 1979.194  | 11.27      | 11.27       | 7.692    | 648.916      |             | 2     | 12                  | 2553.668     | 10.642 | 31799.008   | 9208.433   |
| 74     | 0                       | 0.000     | 0.000        | 0.000     | 0.00       | 0.00        | 0.000    | 0.000        |             | 0     | 21                  | 2965.520     | 8.948  | 29916.721   | 8639.021   |
| 75     | 0                       | 0.000     | 0.000        | 0.000     | 0.00       | 0.00        | 0.000    | 0.000        |             | 0     | 11                  | 2164.047     | 9.509  | 25781.447   | 7132.195   |
| 76     | 4                       | 977.138   | 4.175        | 4140.838  | 16.32      | 4.08        | 10.256   | 160.823      |             | 1     | 35                  | 5008.862     | 7.400  | 46509.864   | 12763.253  |
| 77     | 1                       | 513.137   | 2.100        | 1077.588  | 8.04       | 8.04        | 2.174    | 513.137      |             | 1     | 45                  | 5865.716     | 8.187  | 64936.907   | 18565.682  |
| 78     | 0                       | 0.000     | 0.000        | 0.000     | 0.00       | 0.00        | 0.000    | 0.000        |             | 0     | 18                  | 2879.332     | 8.700  | 28231.168   | 7534.815   |
| 79     | 0                       | 0.000     | 0.000        | 0.000     | 0.00       | 0.00        | 0.000    | 0.000        |             | 0     | 20                  | 2677.343     | 8.560  | 26275.828   | 7128.091   |
| 80     | 0                       | 0.000     | 0.000        | 0.000     | 0.00       | 0.00        | 0.000    | 0.000        |             | 0     | 40                  | 5239.525     | 8.168  | 57304.088   | 15009.660  |
| 81     | 0                       | 0.000     | 0.000        | 0.000     | 0.00       | 0.00        | 0.000    | 0.000        |             | 0     | 26                  | 3547.223     | 12.231 | 49078.668   | 14164.091  |
| 82     | 0                       | 0.000     | 0.000        | 0.000     | 0.00       | 0.00        | 0.000    | 0.000        |             | 0     | 10                  | 3297.028     | 14.930 | 56409.491   | 16779.796  |
| 83     | 0                       | 0.000     | 0.000        | 0.000     | 0.00       | 0.00        | 0.000    | 0.000        |             | 0     | 14                  | 1831.055     | 24.750 | 38415.014   | 10885.231  |
| 85     | 0                       | 0.000     | 0.000        | 0.000     | 0.00       | 0.00        | 0.000    | 0.000        |             | 0     | 18                  | 3525.309     | 12.344 | 51320.681   | 14780.448  |
| 86     | 0                       | 0.000     | 0.000        | 0.000     | 0.00       | 0.00        | 0.000    | 0.000        |             | 0     | 10                  | 5097.423     | 11.320 | 71978.215   | 20197.184  |
| 87     | 10                      | 1952.196  | 8.810        | 19078.147 | 46.32      | 4.63        | 41.667   | 28.883       |             | 2     | 14                  | 2262.014     | 15.314 | 36446.151   | 10113.024  |
| 88     | 0                       | 0.000     | 0.000        | 0.000     | 0.00       | 0.00        | 0.000    | 0.000        |             | 0     | 21                  | 5437.584     | 15.100 | 92550.210   | 26619.071  |
| 89     | 0                       | 0.000     | 0.000        | 0.000     | 0.00       | 0.00        | 0.000    | 0.000        |             | 0     | 14                  | 2675.226     | 13.629 | 38445.690   | 11230.351  |
| 92     | 0                       | 0.000     | 0.000        | 0.000     | 0.00       | 0.00        | 0.000    | 0.000        |             | 0     | 23                  | 3833.306     | 13.617 | 69181.119   | 20095.808  |
| 93     | 0                       | 0.000     | 0.000        | 0.000     | 0.00       | 0.00        | 0.000    | 0.000        |             | 0     | 36                  | 6880.176     | 14.375 | 129368.305  | 37801.756  |
| 94     | 0                       | 0.000     | 0.000        | 0.000     | 0.00       | 0.00        | 0.000    | 0.000        |             | 0     | 33                  | 6503.787     | 15.770 | 118070.271  | 33501.577  |
| 95     | 0                       | 0.000     | 0.000        | 0.000     | 0.00       | 0.00        | 0.000    | 0.000        |             | 0     | 13                  | 2759.211     | 11.077 | 40630.466   | 11939.630  |
| 96     | 4                       | 635.144   | 7.625        | 8069.247  | 20.37      | 5.09        | 16.667   | 238.207      |             | 2     | 20                  | 2483.316     | 11.915 | 39983.564   | 9878.656   |
| 97     | 0                       | 0.000     | 0.000        | 0.000     | 0.00       | 0.00        | 0.000    | 0.000        |             | 0     | 37                  | 2907.614     | 6.176  | 21739.598   | 6023.362   |
| 99     | 2                       | 1187.389  | 6.750        | 10365.529 | 42.14      | 21.07       | 16.667   | 47.031       |             | 2     | 10                  | 1630.346     | 14.270 | 26327.513   | 7255.551   |
| 100    | 0                       | 0.000     | 0.000        | 0.000     | 0.00       | 0.00        | 0.000    | 0.000        |             | 0     | 15                  | 4202.924     | 16.167 | 69430.060   | 20505.237  |
| 101    | 8                       | 1971.022  | 12.688       | 33181.928 | 28.39      | 3.55        | 33.333   | 86.772       |             | 3     | 16                  | 4971.722     | 14.737 | 79803.414   | 22938.152  |
| 102    | 1                       | 264.666   | 4.900        | 1296.863  | 4.63       | 4.63        | 3.333    | 264.666      |             | 1     | 29                  | 5452.580     | 12.283 | 76498.526   | 21526.974  |
| 103    | 1                       | 571.445   | 4.300        | 2457.214  | 7.25       | 7.25        | 4.167    | 571.445      |             | 1     | 23                  | 7315.248     | 16.035 | 138526.198  | 39490.162  |
| 105    | 0                       | 0.000     | 0.000        | 0.000     | 0.00       | 0.00        | 0.000    | 0.000        |             | 0     | 32                  | 3806.037     | 8.903  | 50704.363   | 14268.791  |
| 106    | 1                       | 71.175    | 3.400        | 241.995   | 0.63       | 0.63        | 5.556    | 71.175       |             | 1     | 17                  | 11302.110    | 10.476 | 134285.132  | 37801.593  |
| 107    | 5                       | 1778.509  | 4.020        | 7715.973  | 22.02      | 4.40        | 16.129   | 229.017      |             | 1     | 26                  | 6300.065     | 11.450 | 91138.757   | 26408.762  |
| 108    | 2                       | 953.315   | 8.250        | 10284.008 | 20.52      | 10.26       | 15.385   | 154.103      |             | 2     | 11                  | 3691.577     | 21.673 | 66640.337   | 19344.054  |
| 109    | 5                       | 1061.678  | 3.660        | 4332.124  | 11.16      | 2.23        | 5.952    | 668.649      |             | 1     | 79                  | 8447.726     | 7.327  | 86076.127   | 24011.659  |
| 110    | 17                      | 2800.563  | 12.194       | 32969.054 | 46.13      | 2.71        | 44.737   | 901.155      |             | 3     | 21                  | 3270.915     | 12.071 | 38971.897   | 11387.794  |
| 111    | 0                       | 0.000     | 0.000        | 0.000     | 0.00       | 0.00        | 0.000    | 0.000        |             | 0     | 29                  | 3963.497     | 9.328  | 53370.324   | 14964.818  |
| 113    | 0                       | 0.000     | 0.000        | 0.000     | 0.00       | 0.00        | 0.000    | 0.000        |             | 0     | 18                  | 6481.588     | 15.922 | 87111.646   | 25159.044  |
| 114    | 10                      | 3465.135  | 5.010        | 19348.175 | 49.71      | 4.97        | 27.027   | 199.305      |             | 1     | 27                  | 3505.586     | 8.044  | 36392.148   | 10247.274  |
| 115    | 3                       | 699.311   | 6.467        | 4568.371  | 9.88       | 3.29        | 8.333    | 440.922      |             | 1     | 33                  | 6379.469     | 10.021 | 78614.845   | 22335.294  |
| 116    | 0                       | 0.000     | 0.000        | 0.000     | 0.00       | 0.00        | 0.000    | 0.000        |             | 0     | 53                  | 12094.464    | 22.877 | 190463.426  | 55419.901  |
| 117    | 0                       | 0.000     | 0.000        | 0.000     | 0.00       | 0.00        | 0.000    | 0.000        |             | 0     | 43                  | 9709.336     | 11.028 | 154427.196  | 42638.591  |
| 118    | 1                       | 326.573   | 3.200        | 1045.034  | 7.86       | 7.86        | 5.000    | 326.573      |             | 1     | 19                  | 3828.755     | 10.705 | 47578.493   | 13523.116  |
| 119    | 0                       | 0.000     | 0.000        | 0.000     | 0.00       | 0.00        | 0.000    | 0.000        |             | 0     | 12                  | 4040.962     | 14.492 | 72091.372   | 20695.909  |
| 121    | 1                       | 345.384   | 4.100        | 1416.074  | 5.36       | 5.36        | 3.846    | 345.384      |             | 1     | 25                  | 6092.714     | 11.588 | 89401.012   | 24987.696  |
| 123    | 0                       | 0.000     | 0.000        | 0.000     | 0.00       | 0.00        | 0.000    | 0.000        |             | 0     | 29                  | 3467.409     | 9.869  | 46649.263   | 12793.340  |
| 124    | 6                       | 1338.871  | 7.083        | 8979.159  | 12.04      | 2.01        | 12.766   | 105.485      |             | 2     | 41                  | 9781.077     | 11.798 | 144815.131  | 40937.393  |
| 125    | 2                       | 462.081   | 6.200        | 3186.825  | 7.81       | 3.90        | 5.263    | 123.737      |             | 2     | 36                  | 5451.468     | 9.461  | 65300.918   | 18701.393  |
| 127    | 0                       | 0.000     | 0.000        | 0.000     | 0.00       | 0.00        | 0.000    | 0.000        |             | 0     | 35                  | 4513.628     | 9.091  | 57261.996   | 16844.857  |
| 128    | 0                       | 0.000     | 0.000        | 0.000     | 0.00       | 0.00        | 0.000    | 0.000        |             | 0     | 19                  | 3333.195     | 10.521 | 43308.386   | 11954.170  |
| 130    | 0                       | 0.000     | 0.000        | 0.000     | 0.00       | 0.00        | 0.000    | 0.000        |             | 0     | 31                  | 4506.935     | 14.297 | 71510.608   | 20476.142  |
| 132    | 0                       | 0.000     | 0.000        | 0.000     | 0.00       | 0.00        | 0.000    | 0.000        |             | 0     | 57                  | 7177.844     | 9.082  | 82509.268   | 23262.265  |
| 133    | 0                       | 0.000     | 0.000        | 0.000     | 0.00       | 0.00        | 0.000    | 0.000        |             | 0     | 49                  | 8526.962     | 8.580  | 92570.860   | 25444.803  |
| 134    | 4                       | 1830.595  | 5.100        | 8612.161  | 45.50      | 11.38       | 28.571   | 113.263      |             | 1     | 10                  | 2192.254     | 13.490 | 32786.128   | 9136.046   |
| 135    | 3                       | 457.156   | 11.433       | 5907.674  | 8.22       | 2.74        | 6.667    | 307.788      |             | 3     | 42                  | 5103.050     | 9.426  | 61800.982   | 17160.224  |
| 139    | 6                       | 1047.344  | 3.867        | 4618.360  | 16.14      | 2.69        | 15.385   | 44.881       |             | 1     | 33                  | 5440.254     | 9.561  | 63986.449   | 17324.574  |
| 140    | 0                       | 0.000     | 0.000        | 0.000     | 0.00       | 0.00        | 0.000    | 0.000        |             | 0     | 17                  | 3462.935     | 11.088 | 51069.889   | 14321.740  |

| COD_UN | IND=INDUSTRIAL BUILDING |           |              |           |            |             |          |              |             | No_GB | GB=GENERIC BUILDING |              |        |             |            |
|--------|-------------------------|-----------|--------------|-----------|------------|-------------|----------|--------------|-------------|-------|---------------------|--------------|--------|-------------|------------|
|        | No_IND                  | COVER_IND | AVRG. HEIGHT | VOL_IND   | %_AREA_IND | %_AREA_1IND | %_No_IND | COVERXNF_IND | AVRG_NF_IND |       | COVER_GB            | AVRG. HEIGHT | VOL_GB | COVERXNF_GB | AVRG_NF_GB |
| 141    | 0                       | 0.000     | 0.000        | 0.000     | 0.00       | 0.00        | 0.00     | 0.000        | 0.000       | 0     | 11                  | 3426.089     | 12.500 | 54347.142   | 15095.593  |
| 142    | 0                       | 0.000     | 0.000        | 0.000     | 0.00       | 0.00        | 0.00     | 0.000        | 0.000       | 0     | 21                  | 3923.204     | 9.371  | 48908.189   | 13334.853  |
| 143    | 0                       | 0.000     | 0.000        | 0.000     | 0.00       | 0.00        | 0.00     | 0.000        | 0.000       | 0     | 48                  | 6197.005     | 8.015  | 72603.127   | 20424.638  |
| 144    | 0                       | 0.000     | 0.000        | 0.000     | 0.00       | 0.00        | 0.00     | 0.000        | 0.000       | 0     | 22                  | 4742.760     | 9.991  | 68171.353   | 19558.360  |
| 145    | 0                       | 0.000     | 0.000        | 0.000     | 0.00       | 0.00        | 0.00     | 0.000        | 0.000       | 0     | 18                  | 2927.753     | 12.933 | 44396.306   | 12586.584  |
| 147    | 0                       | 0.000     | 0.000        | 0.000     | 0.00       | 0.00        | 0.00     | 0.000        | 0.000       | 0     | 20                  | 6156.310     | 8.790  | 52769.244   | 14870.532  |
| 148    | 5                       | 1120.356  | 6.440        | 8581.836  | 22.65      | 4.53        | 21.739   | 204.578      |             | 2     | 18                  | 3825.847     | 9.750  | 50593.711   | 14135.576  |
| 149    | 0                       | 0.000     | 0.000        | 0.000     | 0.00       | 0.00        | 0.00     | 0.000        | 0.000       | 0     | 29                  | 4441.317     | 9.683  | 60090.061   | 16541.714  |
| 150    | 0                       | 0.000     | 0.000        | 0.000     | 0.00       | 0.00        | 0.00     | 0.000        | 0.000       | 0     | 26                  | 3390.402     | 8.542  | 36022.973   | 10048.509  |
| 151    | 3                       | 882.654   | 6.433        | 5596.591  | 10.21      | 3.40        | 7.500    | 712.830      |             | 2     | 37                  | 7763.023     | 9.781  | 86272.293   | 23771.064  |
| 152    | 0                       | 0.000     | 0.000        | 0.000     | 0.00       | 0.00        | 0.00     | 0.000        | 0.000       | 0     | 32                  | 3732.416     | 8.344  | 39324.766   | 11124.796  |
| 153    | 4                       | 1483.250  | 9.100        | 13568.733 | 11.08      | 2.77        | 7.018    | 394.047      |             | 2     | 53                  | 11904.052    | 9.989  | 144727.417  | 41514.669  |
| 154    | 3                       | 1617.676  | 5.567        | 9191.006  | 35.81      | 11.94       | 11.111   | 1637.976     |             | 1     | 24                  | 2899.654     | 6.321  | 20806.511   | 5289.577   |
| 156    | 0                       | 0.000     | 0.000        | 0.000     | 0.00       | 0.00        | 0.00     | 0.000        | 0.000       | 0     | 22                  | 6118.447     | 11.709 | 84776.199   | 23545.664  |
| 157    | 0                       | 0.000     | 0.000        | 0.000     | 0.00       | 0.00        | 0.00     | 0.000        | 0.000       | 0     | 12                  | 2355.856     | 11.450 | 32478.425   | 9314.652   |
| 158    | 0                       | 0.000     | 0.000        | 0.000     | 0.00       | 0.00        | 0.00     | 0.000        | 0.000       | 0     | 16                  | 1939.019     | 9.656  | 26438.587   | 6194.451   |
| 159    | 0                       | 0.000     | 0.000        | 0.000     | 0.00       | 0.00        | 0.00     | 0.000        | 0.000       | 0     | 19                  | 2185.321     | 9.063  | 24489.376   | 6260.098   |
| 160    | 0                       | 0.000     | 0.000        | 0.000     | 0.00       | 0.00        | 0.00     | 0.000        | 0.000       | 0     | 8                   | 3680.693     | 14.275 | 57121.463   | 16986.280  |
| 161    | 0                       | 0.000     | 0.000        | 0.000     | 0.00       | 0.00        | 0.00     | 0.000        | 0.000       | 0     | 29                  | 4701.071     | 17.179 | 78061.186   | 23331.248  |
| 162    | 0                       | 0.000     | 0.000        | 0.000     | 0.00       | 0.00        | 0.00     | 0.000        | 0.000       | 0     | 8                   | 1522.901     | 31.663 | 46429.079   | 13740.848  |
| 163    | 0                       | 0.000     | 0.000        | 0.000     | 0.00       | 0.00        | 0.00     | 0.000        | 0.000       | 0     | 21                  | 2718.543     | 27.186 | 70660.421   | 20544.211  |
| 164    | 0                       | 0.000     | 0.000        | 0.000     | 0.00       | 0.00        | 0.00     | 0.000        | 0.000       | 0     | 21                  | 5142.834     | 20.224 | 125793.727  | 35791.753  |
| 165    | 0                       | 0.000     | 0.000        | 0.000     | 0.00       | 0.00        | 0.00     | 0.000        | 0.000       | 0     | 10                  | 3231.674     | 11.630 | 43499.945   | 11631.142  |
| 166    | 0                       | 0.000     | 0.000        | 0.000     | 0.00       | 0.00        | 0.00     | 0.000        | 0.000       | 0     | 13                  | 3520.903     | 15.685 | 55612.813   | 15792.848  |
| 167    | 0                       | 0.000     | 0.000        | 0.000     | 0.00       | 0.00        | 0.00     | 0.000        | 0.000       | 0     | 28                  | 6385.483     | 11.268 | 86447.331   | 23016.593  |
| 169    | 0                       | 0.000     | 0.000        | 0.000     | 0.00       | 0.00        | 0.00     | 0.000        | 0.000       | 0     | 26                  | 8672.852     | 16.146 | 145401.230  | 40952.157  |
| 170    | 0                       | 0.000     | 0.000        | 0.000     | 0.00       | 0.00        | 0.00     | 0.000        | 0.000       | 0     | 3                   | 1647.381     | 30.600 | 50461.012   | 14826.429  |
| 171    | 0                       | 0.000     | 0.000        | 0.000     | 0.00       | 0.00        | 0.00     | 0.000        | 0.000       | 0     | 31                  | 4399.126     | 8.442  | 37617.064   | 10204.075  |
| 172    | 2                       | 752.004   | 7.350        | 5510.035  | 20.38      | 10.19       | 7.143    | 713.796      |             | 2     | 26                  | 2938.802     | 6.669  | 29915.031   | 8468.880   |
| 173    | 8                       | 1866.781  | 8.038        | 16050.745 | 32.65      | 4.08        | 21.622   | 1509.966     |             | 2     | 29                  | 3850.036     | 8.238  | 39318.983   | 10870.716  |
| 174    | 8                       | 963.474   | 5.838        | 8857.729  | 8.88       | 1.11        | 9.639    | 50.841       |             | 2     | 75                  | 9885.315     | 9.452  | 115873.659  | 33251.633  |
| 175    | 4                       | 720.648   | 8.675        | 2945.243  | 9.12       | 2.28        | 12.903   | 247.122      |             | 2     | 27                  | 7185.272     | 18.663 | 127708.714  | 36521.381  |
| 177    | 1                       | 164.656   | 2.800        | 461.037   | 2.34       | 2.34        | 3.448    | 164.656      |             | 1     | 28                  | 6875.297     | 12.461 | 117064.763  | 33426.893  |
| 178    | 1                       | 35.478    | 3.200        | 1602.739  | 0.83       | 0.83        | 4.348    | 35.478       |             | 1     | 22                  | 4242.086     | 20.086 | 88094.783   | 25675.403  |
| 179    | 0                       | 0.000     | 0.000        | 0.000     | 0.00       | 0.00        | 0.00     | 0.000        | 0.000       | 0     | 28                  | 4799.950     | 14.875 | 76021.577   | 21122.869  |
| 180    | 6                       | 3943.431  | 5.833        | 32709.087 | 43.87      | 7.31        | 28.571   | 270.489      |             | 2     | 15                  | 5045.743     | 7.107  | 44880.096   | 10012.812  |
| 181    | 0                       | 0.000     | 0.000        | 0.000     | 0.00       | 0.00        | 0.00     | 0.000        | 0.000       | 0     | 39                  | 7055.414     | 14.421 | 124090.955  | 33880.165  |
| 184    | 0                       | 0.000     | 0.000        | 0.000     | 0.00       | 0.00        | 0.00     | 0.000        | 0.000       | 0     | 55                  | 11210.093    | 15.178 | 212718.215  | 61093.004  |
| 185    | 0                       | 0.000     | 0.000        | 0.000     | 0.00       | 0.00        | 0.00     | 0.000        | 0.000       | 0     | 14                  | 2469.287     | 7.136  | 22672.510   | 6379.206   |
| 189    | 1                       | 218.219   | 7.100        | 5622.000  | 5.28       | 5.28        | 8.333    | 436.438      |             | 2     | 11                  | 3915.132     | 16.318 | 84163.712   | 17899.145  |
| 190    | 0                       | 0.000     | 0.000        | 0.000     | 0.00       | 0.00        | 0.00     | 0.000        | 0.000       | 0     | 41                  | 7579.427     | 13.305 | 118847.640  | 30993.162  |
| 191    | 0                       | 0.000     | 0.000        | 0.000     | 0.00       | 0.00        | 0.00     | 0.000        | 0.000       | 0     | 21                  | 3677.157     | 10.914 | 55660.767   | 13255.889  |
| 192    | 1                       | 961.777   | 6.500        | 6251.551  | 33.15      | 33.15       | 12.500   | 1923.554     |             | 2     | 7                   | 1939.411     | 10.886 | 31385.503   | 8698.232   |
| 193    | 0                       | 0.000     | 0.000        | 0.000     | 0.00       | 0.00        | 0.00     | 0.000        | 0.000       | 0     | 11                  | 1407.926     | 10.409 | 20418.501   | 4823.006   |
| 195    | 0                       | 0.000     | 0.000        | 0.000     | 0.00       | 0.00        | 0.00     | 0.000        | 0.000       | 0     | 53                  | 13672.577    | 13.558 | 253241.177  | 72639.387  |
| 196    | 0                       | 0.000     | 0.000        | 0.000     | 0.00       | 0.00        | 0.00     | 0.000        | 0.000       | 0     | 24                  | 3681.030     | 11.450 | 44398.121   | 12872.445  |
| 197    | 0                       | 0.000     | 0.000        | 0.000     | 0.00       | 0.00        | 0.00     | 0.000        | 0.000       | 0     | 15                  | 3451.380     | 11.933 | 68479.939   | 19576.429  |
| 199    | 5                       | 1239.575  | 13.120       | 22411.476 | 37.36      | 7.47        | 35.714   | 924.336      |             | 4     | 9                   | 2078.490     | 13.633 | 32512.170   | 9614.527   |
| 200    | 0                       | 0.000     | 0.000        | 0.000     | 0.00       | 0.00        | 0.00     | 0.000        | 0.000       | 0     | 24                  | 5800.082     | 15.429 | 135406.172  | 39418.759  |
| 202    | 2                       | 1350.634  | 7.500        | 9696.455  | 31.85      | 15.93       | 6.250    | 2217.234     |             | 2     | 30                  | 2889.955     | 9.927  | 32383.821   | 8812.752   |
| 203    | 5                       | 2321.606  | 10.600       | 33221.782 | 48.36      | 9.67        | 35.714   | 287.089      |             | 3     | 9                   | 2478.832     | 14.444 | 43822.514   | 13176.010  |
| 205    | 3                       | 1219.189  | 12.633       | 11272.977 | 25.40      | 8.47        | 21.429   | 793.780      |             | 3     | 11                  | 3580.128     | 10.855 | 48853.629   | 13747.746  |
| 206    | 6                       | 1183.975  | 5.333        | 6106.639  | 19.35      | 3.23        | 18.750   | 251.781      |             | 1     | 26                  | 4933.542     | 10.135 | 70237.304   | 19983.825  |
| 208    | 1                       | 79.684    | 3.100        | 247.020   | 1.89       | 1.89        | 4.000    | 79.684       |             | 1     | 24                  | 4129.058     | 9.900  | 56097.442   | 16272.564  |
| 209    | 6                       | 1263.117  | 4.250        | 5150.625  | 31.78      | 5.30        | 15.789   | 56.847       |             | 1     | 32                  | 2712.016     | 7.331  | 24114.205   | 6572.170   |

| COD_UN | IND=INDUSTRIAL BUILDING |           |              |           |            |             |          |              |              | No_GB | GB=GENERIC BUILDING |              |        |             |             |
|--------|-------------------------|-----------|--------------|-----------|------------|-------------|----------|--------------|--------------|-------|---------------------|--------------|--------|-------------|-------------|
|        | No_IND                  | COVER_IND | AVRG. HEIGHT | VOL_IND   | %_AREA_IND | %_AREA_1IND | %_No_IND | COVERXNF_IND | AVRG. NF_IND |       | COVER_GB            | AVRG. HEIGHT | VOL_GB | COVERXNF_GB | AVRG. NF_GB |
| 210    | 12                      | 2256.140  | 4.558        | 10681.535 | 32.93      | 2.74        | 21.053   | 23.989       |              | 1     | 45                  | 4595.890     | 7.209  | 45403.755   | 12861.485   |
| 211    | 2                       | 339.414   | 3.250        | 1291.218  | 6.78       | 3.39        | 4.348    | 24.997       |              | 1     | 44                  | 4668.747     | 7.620  | 38131.557   | 10642.178   |
| 212    | 9                       | 4295.644  | 6.011        | 26754.114 | 54.92      | 6.10        | 36.000   | 516.321      |              | 2     | 16                  | 3526.692     | 13.050 | 47152.423   | 13229.413   |
| 213    | 1                       | 1717.063  | 7.700        | 13221.385 | 35.39      | 35.39       | 3.704    | 3434.126     |              | 2     | 26                  | 3135.313     | 10.688 | 40424.576   | 11642.149   |
| 214    | 6                       | 1154.400  | 4.267        | 10589.529 | 36.81      | 6.14        | 42.857   | 242.370      |              | 1     | 8                   | 1981.830     | 11.662 | 38316.975   | 7703.614    |
| 217    | 1                       | 225.949   | 3.800        | 858.606   | 2.84       | 2.84        | 1.961    | 225.949      |              | 1     | 50                  | 7742.981     | 11.495 | 100644.600  | 29935.635   |
| 225    | 0                       | 0.000     | 0.000        | 0.000     | 0.00       | 0.00        | 0.000    | 0.000        |              | 0     | 11                  | 1942.219     | 21.427 | 51834.795   | 14890.911   |
| 228    | 0                       | 0.000     | 0.000        | 0.000     | 0.00       | 0.00        | 0.000    | 0.000        |              | 0     | 16                  | 2571.237     | 13.581 | 66009.664   | 14430.405   |
| 229    | 0                       | 0.000     | 0.000        | 0.000     | 0.00       | 0.00        | 0.000    | 0.000        |              | 0     | 26                  | 5000.287     | 8.892  | 56733.541   | 14865.068   |
| 230    | 4                       | 711.132   | 3.600        | 2957.138  | 26.16      | 6.54        | 18.182   | 150.638      |              | 1     | 18                  | 2007.422     | 6.200  | 15045.149   | 4446.105    |
| 231    | 0                       | 0.000     | 0.000        | 0.000     | 0.00       | 0.00        | 0.000    | 0.000        |              | 0     | 6                   | 506.761      | 5.700  | 4636.125    | 948.899     |
| 233    | 0                       | 0.000     | 0.000        | 0.000     | 0.00       | 0.00        | 0.000    | 0.000        |              | 0     | 35                  | 3673.381     | 5.589  | 28984.250   | 7903.371    |
| 235    | 0                       | 0.000     | 0.000        | 0.000     | 0.00       | 0.00        | 0.000    | 0.000        |              | 0     | 21                  | 4596.038     | 25.738 | 79321.919   | 22143.054   |
| 236    | 0                       | 0.000     | 0.000        | 0.000     | 0.00       | 0.00        | 0.000    | 0.000        |              | 0     | 9                   | 3592.595     | 21.400 | 63667.663   | 16915.513   |
| 237    | 0                       | 0.000     | 0.000        | 0.000     | 0.00       | 0.00        | 0.000    | 0.000        |              | 0     | 66                  | 9881.334     | 19.748 | 183605.886  | 52716.096   |
| 238    | 0                       | 0.000     | 0.000        | 0.000     | 0.00       | 0.00        | 0.000    | 0.000        |              | 0     | 14                  | 5299.410     | 15.793 | 87545.139   | 25300.033   |
| 239    | 0                       | 0.000     | 0.000        | 0.000     | 0.00       | 0.00        | 0.000    | 0.000        |              | 0     | 30                  | 5037.216     | 9.580  | 63000.454   | 16936.159   |
| 240    | 2                       | 532.962   | 6.750        | 3654.258  | 7.25       | 3.63        | 5.714    | 911.392      |              | 2     | 33                  | 6818.972     | 12.400 | 83556.221   | 23469.741   |
| 243    | 1                       | 623.998   | 8.900        | 9620.259  | 5.46       | 5.46        | 1.408    | 1247.996     |              | 2     | 70                  | 10810.757    | 28.509 | 279023.028  | 79639.445   |
| 244    | 2                       | 528.039   | 5.800        | 3469.998  | 5.99       | 3.00        | 5.405    | 37.012       |              | 2     | 35                  | 8293.652     | 10.754 | 110288.306  | 28392.590   |
| 245    | 0                       | 0.000     | 0.000        | 0.000     | 0.00       | 0.00        | 0.000    | 0.000        |              | 0     | 44                  | 17167.917    | 17.845 | 272252.685  | 78020.807   |
| 247    | 0                       | 0.000     | 0.000        | 0.000     | 0.00       | 0.00        | 0.000    | 0.000        |              | 0     | 30                  | 4113.856     | 11.797 | 69864.336   | 19495.226   |
| 250    | 3                       | 490.528   | 4.467        | 2165.344  | 5.22       | 1.74        | 3.529    | 223.181      |              | 1     | 82                  | 8914.604     | 6.913  | 92923.801   | 26331.739   |
| 251    | 0                       | 0.000     | 0.000        | 0.000     | 0.00       | 0.00        | 0.000    | 0.000        |              | 0     | 5                   | 1793.455     | 14.180 | 29216.454   | 7657.781    |
| 252    | 8                       | 2039.775  | 8.563        | 17872.201 | 27.97      | 3.50        | 28.571   | 19.596       |              | 2     | 20                  | 5253.332     | 18.420 | 130427.368  | 37646.156   |
| 253    | 20                      | 5723.557  | 11.040       | 76197.783 | 57.48      | 2.87        | 46.512   | 47.373       |              | 3     | 23                  | 4234.107     | 9.426  | 46608.518   | 12161.253   |
| 254    | 0                       | 0.000     | 0.000        | 0.000     | 0.00       | 0.00        | 0.000    | 0.000        |              | 0     | 61                  | 8357.308     | 17.311 | 135994.596  | 38748.881   |
| 255    | 4                       | 576.729   | 5.450        | 4042.090  | 35.24      | 8.81        | 30.769   | 106.526      |              | 1     | 9                   | 1059.957     | 8.222  | 9069.358    | 2558.717    |
| 258    | 2                       | 1523.328  | 4.800        | 7140.238  | 67.85      | 33.92       | 33.333   | 525.563      |              | 1     | 4                   | 721.767      | 5.225  | 4050.215    | 1112.422    |
| 262    | 0                       | 0.000     | 0.000        | 0.000     | 0.00       | 0.00        | 0.000    | 0.000        |              | 0     | 27                  | 2550.963     | 7.189  | 22410.418   | 6477.178    |
| 263    | 5                       | 1562.919  | 5.280        | 7326.588  | 46.89      | 9.38        | 31.250   | 357.125      |              | 1     | 11                  | 1770.263     | 12.209 | 36192.013   | 10486.367   |
| 265    | 0                       | 0.000     | 0.000        | 0.000     | 0.00       | 0.00        | 0.000    | 0.000        |              | 0     | 25                  | 5510.725     | 7.572  | 49026.755   | 13221.181   |
| 268    | 0                       | 0.000     | 0.000        | 0.000     | 0.00       | 0.00        | 0.000    | 0.000        |              | 0     | 31                  | 2962.639     | 7.623  | 30774.620   | 8640.610    |
| 269    | 2                       | 579.051   | 2.950        | 2373.075  | 16.76      | 8.38        | 5.263    | 535.775      |              | 0     | 36                  | 2875.874     | 6.330  | 22049.675   | 6075.070    |
| 271    | 1                       | 2140.848  | 5.600        | 11988.749 | 45.08      | 45.08       | 5.000    | 2140.848     |              | 1     | 19                  | 2607.887     | 11.679 | 35945.612   | 10477.372   |
| 272    | 2                       | 778.152   | 10.150       | 7824.578  | 52.89      | 26.45       | 28.571   | 800.818      |              | 2     | 5                   | 693.051      | 7.120  | 5954.370    | 1648.649    |
| 273    | 1                       | 584.743   | 4.800        | 2806.767  | 8.52       | 8.52        | 5.263    | 584.743      |              | 1     | 18                  | 6282.066     | 14.372 | 108485.336  | 31081.868   |
| 274    | 5                       | 1536.181  | 8.440        | 13313.330 | 28.66      | 5.73        | 15.152   | 11.150       |              | 2     | 28                  | 3823.171     | 10.732 | 51564.067   | 14585.564   |
| 277    | 0                       | 0.000     | 0.000        | 0.000     | 0.00       | 0.00        | 0.000    | 0.000        |              | 0     | 29                  | 12932.648    | 8.972  | 107220.883  | 32171.095   |
| 279    | 0                       | 0.000     | 0.000        | 0.000     | 0.00       | 0.00        | 0.000    | 0.000        |              | 0     | 37                  | 9242.071     | 21.914 | 194438.445  | 54790.519   |
| 280    | 4                       | 799.727   | 6.725        | 4550.962  | 29.51      | 7.38        | 25.000   | 51.368       |              | 2     | 12                  | 1910.233     | 6.117  | 15003.065   | 4152.449    |
| 281    | 0                       | 0.000     | 0.000        | 0.000     | 0.00       | 0.00        | 0.000    | 0.000        |              | 0     | 29                  | 4417.486     | 12.083 | 67614.151   | 18739.294   |
| 282    | 15                      | 7435.869  | 5.387        | 39644.056 | 50.44      | 3.36        | 32.609   | 1024.502     |              | 1     | 31                  | 7305.790     | 8.645  | 78571.542   | 22728.824   |
| 283    | 18                      | 3634.946  | 5.817        | 20535.737 | 25.18      | 1.40        | 32.727   | 576.094      |              | 2     | 37                  | 10799.621    | 7.435  | 122682.405  | 34250.835   |
| 284    | 0                       | 0.000     | 0.000        | 0.000     | 0.00       | 0.00        | 0.000    | 0.000        |              | 0     | 18                  | 4601.823     | 9.928  | 64006.662   | 18450.967   |
| 285    | 0                       | 0.000     | 0.000        | 0.000     | 0.00       | 0.00        | 0.000    | 0.000        |              | 0     | 16                  | 2836.401     | 14.938 | 48399.826   | 13907.695   |

| COD_UN | URBAN AREA |           |           |         |                                 |                   | LB=LISTED BUILDING |          |           |            |         |
|--------|------------|-----------|-----------|---------|---------------------------------|-------------------|--------------------|----------|-----------|------------|---------|
|        | GROUND_ALT | AREA_TERR | PERIMETER | COD_PUG | DEC_PUG                         | EPOCH             | No_LB              | COVER_LB | %_AREA_LB | %_AREA_1LB | %_No_LB |
| 0      | 67.413     | 9829.749  | 615.756   | RIG     | Parts of the city to regenerate | built before 1971 | 1                  | 120.872  | 3.87      | 3.870      | 5.556   |
| 1      | 76.438     | 17134.415 | 576.409   | RIG     | Parts of the city to regenerate | built before 1971 | 0                  | 0.000    | 0.00      | 0.000      | 0.000   |
| 2      | 72.282     | 9726.656  | 602.359   | RIG     | Parts of the city to regenerate | built before 1971 | 1                  | 98.411   | 4.86      | 4.860      | 9.091   |
| 3      | 85.737     | 21085.061 | 754.189   | RIG     | Parts of the city to regenerate | built before 1971 | 0                  | 0.000    | 0.00      | 0.000      | 0.000   |
| 4      | 80.262     | 9063.653  | 451.454   | RIG     | Parts of the city to regenerate | built before 1971 | 0                  | 0.000    | 0.00      | 0.000      | 0.000   |
| 5      | 79.388     | 9190.960  | 407.737   | RIG     | Parts of the city to regenerate | built before 1971 | 2                  | 31.898   | 0.81      | 0.405      | 12.500  |
| 6      | 83.086     | 8823.483  | 416.825   | RIG     | Parts of the city to regenerate | built before 1971 | 0                  | 0.000    | 0.00      | 0.000      | 0.000   |
| 7      | 79.156     | 18423.954 | 797.204   | RIG     | Parts of the city to regenerate | built before 1971 | 1                  | 268.195  | 4.51      | 4.510      | 3.125   |
| 8      | 76.773     | 13790.364 | 555.360   | RIG     | Parts of the city to regenerate | built before 1971 | 0                  | 0.000    | 0.00      | 0.000      | 0.000   |
| 9      | 54.469     | 10778.198 | 537.829   | RIG     | Parts of the city to regenerate | built before 1971 | 0                  | 0.000    | 0.00      | 0.000      | 0.000   |
| 11     | 64.378     | 36199.685 | 870.512   | RIG     | Parts of the city to regenerate | built before 1971 | 10                 | 238.315  | 2.14      | 0.214      | 12.195  |
| 12     | 71.893     | 18704.108 | 641.608   | RIG     | Parts of the city to regenerate | built before 1971 | 5                  | 162.148  | 2.10      | 0.420      | 16.667  |
| 13     | 70.177     | 10063.510 | 400.716   | RIG     | Parts of the city to regenerate | built before 1971 | 0                  | 0.000    | 0.00      | 0.000      | 0.000   |
| 16     | 57.690     | 10196.362 | 465.236   | RIG     | Parts of the city to regenerate | built before 1971 | 0                  | 0.000    | 0.00      | 0.000      | 0.000   |
| 17     | 60.611     | 16519.355 | 692.738   | RIG     | Parts of the city to regenerate | built before 1971 | 1                  | 178.457  | 2.84      | 2.840      | 2.857   |
| 19     | 55.958     | 38750.016 | 1931.326  | RIG     | Parts of the city to regenerate | built before 1971 | 10                 | 118.094  | 0.80      | 0.080      | 9.901   |
| 20     | 62.142     | 15660.901 | 576.600   | RIG     | Parts of the city to regenerate | built before 1971 | 1                  | 199.587  | 3.11      | 3.110      | 2.381   |
| 22     | 61.563     | 17426.627 | 649.170   | RIG     | Parts of the city to regenerate | built before 1971 | 3                  | 114.056  | 1.61      | 0.537      | 7.500   |
| 23     | 60.710     | 17752.721 | 655.040   | RIG     | Parts of the city to regenerate | built before 1971 | 0                  | 0.000    | 0.00      | 0.000      | 0.000   |
| 24     | 50.936     | 9347.368  | 463.325   | RIG     | Parts of the city to regenerate | built before 1971 | 3                  | 153.791  | 5.41      | 1.803      | 12.000  |
| 25     | 60.677     | 13754.988 | 884.618   | RIG     | Parts of the city to regenerate | built before 1971 | 3                  | 157.678  | 3.03      | 1.010      | 10.000  |
| 26     | 56.129     | 8399.580  | 388.837   | RIG     | Parts of the city to regenerate | built before 1971 | 0                  | 0.000    | 0.00      | 0.000      | 0.000   |
| 27     | 50.785     | 8764.090  | 448.939   | RIG     | Parts of the city to regenerate | built before 1971 | 2                  | 161.916  | 6.24      | 3.120      | 8.696   |
| 28     | 49.984     | 23751.557 | 861.671   | RIG     | Parts of the city to regenerate | built before 1971 | 10                 | 181.713  | 2.13      | 0.213      | 17.241  |
| 29     | 55.491     | 12899.727 | 512.122   | RIG     | Parts of the city to regenerate | built before 1971 | 6                  | 102.675  | 1.44      | 0.240      | 19.355  |
| 30     | 51.792     | 8129.682  | 398.940   | RIG     | Parts of the city to regenerate | built before 1971 | 0                  | 0.000    | 0.00      | 0.000      | 0.000   |
| 31     | 61.500     | 11540.401 | 467.818   | RIG     | Parts of the city to regenerate | built before 1971 | 1                  | 104.311  | 2.41      | 2.410      | 4.348   |
| 32     | 60.563     | 10840.113 | 498.959   | RIG     | Parts of the city to regenerate | built before 1971 | 0                  | 0.000    | 0.00      | 0.000      | 0.000   |
| 33     | 53.868     | 17455.724 | 700.486   | RIG     | Parts of the city to regenerate | built before 1971 | 4                  | 77.189   | 1.20      | 0.300      | 7.692   |
| 34     | 53.491     | 24681.681 | 834.316   | RIG     | Parts of the city to regenerate | built before 1971 | 13                 | 105.808  | 1.34      | 0.103      | 17.568  |
| 35     | 57.944     | 10917.533 | 493.227   | RIG     | Parts of the city to regenerate | built before 1971 | 2                  | 139.485  | 3.53      | 1.765      | 7.692   |
| 36     | 50.370     | 11316.972 | 451.449   | RIG     | Parts of the city to regenerate | built before 1971 | 0                  | 0.000    | 0.00      | 0.000      | 0.000   |
| 37     | 53.507     | 10404.050 | 475.911   | RIG     | Parts of the city to regenerate | built before 1971 | 3                  | 203.766  | 4.65      | 1.550      | 11.538  |
| 38     | 49.636     | 15230.369 | 643.497   | RIG     | Parts of the city to regenerate | built before 1971 | 8                  | 292.851  | 5.05      | 0.631      | 17.778  |
| 39     | 58.326     | 37184.468 | 861.673   | RIG     | Parts of the city to regenerate | built before 1971 | 0                  | 0.000    | 0.00      | 0.000      | 0.000   |
| 40     | 58.992     | 9458.571  | 475.131   | RIG     | Parts of the city to regenerate | built before 1971 | 4                  | 465.877  | 12.68     | 3.170      | 16.000  |
| 41     | 58.152     | 11822.513 | 465.603   | RIG     | Parts of the city to regenerate | built before 1971 | 1                  | 231.785  | 3.65      | 3.650      | 4.167   |
| 42     | 55.179     | 25379.368 | 701.182   | RIG     | Parts of the city to regenerate | built before 1971 | 5                  | 246.609  | 2.45      | 0.490      | 10.870  |
| 44     | 57.244     | 10500.496 | 444.012   | RIG     | Parts of the city to regenerate | built before 1971 | 3                  | 128.333  | 3.60      | 1.200      | 16.667  |
| 46     | 49.479     | 15908.715 | 692.875   | RIG     | Parts of the city to regenerate | built before 1971 | 1                  | 277.871  | 5.87      | 5.870      | 4.348   |
| 47     | 51.261     | 34893.599 | 799.700   | RIG     | Parts of the city to regenerate | built before 1971 | 1                  | 461.539  | 5.59      | 5.590      | 3.448   |
| 48     | 51.215     | 15584.149 | 727.315   | RIG     | Parts of the city to regenerate | built before 1971 | 0                  | 0.000    | 0.00      | 0.000      | 0.000   |
| 49     | 55.653     | 9129.830  | 430.330   | RIG     | Parts of the city to regenerate | built before 1971 | 0                  | 0.000    | 0.00      | 0.000      | 0.000   |
| 50     | 54.547     | 13100.207 | 478.713   | RIG     | Parts of the city to regenerate | built before 1971 | 0                  | 0.000    | 0.00      | 0.000      | 0.000   |
| 51     | 49.902     | 25390.817 | 1255.315  | RIG     | Parts of the city to regenerate | built before 1971 | 1                  | 158.378  | 1.65      | 1.650      | 1.961   |
| 52     | 52.110     | 15417.636 | 509.844   | RIG     | Parts of the city to regenerate | built before 1971 | 0                  | 0.000    | 0.00      | 0.000      | 0.000   |
| 56     | 48.850     | 10438.117 | 410.784   | RIG     | Parts of the city to regenerate | built before 1971 | 0                  | 0.000    | 0.00      | 0.000      | 0.000   |
| 57     | 50.676     | 8109.148  | 384.116   | RIG     | Parts of the city to regenerate | built before 1971 | 0                  | 0.000    | 0.00      | 0.000      | 0.000   |
| 58     | 44.029     | 11946.221 | 605.768   | RIG     | Parts of the city to regenerate | built before 1971 | 0                  | 0.000    | 0.00      | 0.000      | 0.000   |
| 60     | 48.016     | 10102.407 | 408.343   | RIG     | Parts of the city to regenerate | built before 1971 | 1                  | 249.437  | 11.23     | 11.230     | 5.882   |
| 62     | 53.226     | 11196.020 | 480.398   | RIG     | Parts of the city to regenerate | built before 1971 | 1                  | 209.164  | 4.26      | 4.260      | 4.348   |
| 64     | 44.033     | 13077.175 | 618.716   | RIG     | Parts of the city to regenerate | built before 1971 | 6                  | 188.596  | 4.84      | 0.807      | 20.000  |
| 67     | 45.800     | 10778.148 | 414.185   | RIG     | Parts of the city to regenerate | built before 1971 | 1                  | 455.498  | 12.47     | 12.470     | 3.571   |
| 68     | 45.017     | 9448.591  | 404.112   | RIG     | Parts of the city to regenerate | built before 1971 | 0                  | 0.000    | 0.00      | 0.000      | 0.000   |
| 70     | 49.844     | 10815.377 | 501.592   | RIG     | Parts of the city to regenerate | built before 1971 | 0                  | 0.000    | 0.00      | 0.000      | 0.000   |

| COD_UN | URBAN AREA |           |           |         |                                 |                   | LB=LISTED BUILDING |          |           |            |         |
|--------|------------|-----------|-----------|---------|---------------------------------|-------------------|--------------------|----------|-----------|------------|---------|
|        | GROUND_ALT | AREA_TERR | PERIMETER | COD_PUG | DEC_PUG                         | EPOCH             | No_LB              | COVER_LB | %_AREA_LB | %_AREA_1LB | %_No_LB |
| 71     | 46.064     | 8980.286  | 588.585   | RIG     | Parts of the city to regenerate | built before 1971 | 3                  | 168.071  | 4.47      | 1.490      | 12.500  |
| 73     | 35.850     | 8122.756  | 380.459   | RIG     | Parts of the city to regenerate | built before 1971 | 0                  | 0.000    | 0.00      | 0.000      | 0.000   |
| 74     | 39.950     | 8016.008  | 411.426   | RIG     | Parts of the city to regenerate | built before 1971 | 1                  | 121.032  | 4.08      | 4.080      | 4.762   |
| 75     | 44.438     | 9597.148  | 459.013   | RIG     | Parts of the city to regenerate | built before 1971 | 0                  | 0.000    | 0.00      | 0.000      | 0.000   |
| 76     | 35.638     | 14426.565 | 575.509   | RIG     | Parts of the city to regenerate | built before 1971 | 0                  | 0.000    | 0.00      | 0.000      | 0.000   |
| 77     | 42.084     | 20069.304 | 792.992   | RIG     | Parts of the city to regenerate | built before 1971 | 7                  | 141.982  | 2.23      | 0.319      | 15.217  |
| 78     | 35.550     | 8272.641  | 431.367   | RIG     | Parts of the city to regenerate | built before 1971 | 0                  | 0.000    | 0.00      | 0.000      | 0.000   |
| 79     | 40.726     | 8692.362  | 444.761   | RIG     | Parts of the city to regenerate | built before 1971 | 0                  | 0.000    | 0.00      | 0.000      | 0.000   |
| 80     | 36.834     | 20827.520 | 612.035   | RIG     | Parts of the city to regenerate | built before 1971 | 9                  | 99.971   | 1.91      | 0.212      | 22.500  |
| 81     | 43.236     | 16118.901 | 704.678   | RIG     | Parts of the city to regenerate | built before 1971 | 0                  | 0.000    | 0.00      | 0.000      | 0.000   |
| 82     | 45.964     | 8830.455  | 413.905   | RIG     | Parts of the city to regenerate | built before 1971 | 0                  | 0.000    | 0.00      | 0.000      | 0.000   |
| 83     | 49.200     | 9776.475  | 447.790   | RIG     | Parts of the city to regenerate | built before 1971 | 0                  | 0.000    | 0.00      | 0.000      | 0.000   |
| 85     | 39.910     | 8949.282  | 400.999   | RIG     | Parts of the city to regenerate | built before 1971 | 0                  | 0.000    | 0.00      | 0.000      | 0.000   |
| 86     | 39.645     | 9225.813  | 410.464   | RIG     | Parts of the city to regenerate | built before 1971 | 0                  | 0.000    | 0.00      | 0.000      | 0.000   |
| 87     | 42.633     | 10795.911 | 804.903   | RIG     | Parts of the city to regenerate | built before 1971 | 1                  | 201.024  | 4.77      | 4.770      | 4.167   |
| 88     | 42.914     | 12201.298 | 506.804   | RIG     | Parts of the city to regenerate | built before 1971 | 1                  | 135.502  | 2.49      | 2.490      | 4.762   |
| 89     | 47.736     | 12606.251 | 471.109   | RIG     | Parts of the city to regenerate | built before 1971 | 0                  | 0.000    | 0.00      | 0.000      | 0.000   |
| 92     | 35.186     | 10836.387 | 433.488   | RIG     | Parts of the city to regenerate | built before 1971 | 0                  | 0.000    | 0.00      | 0.000      | 0.000   |
| 93     | 43.303     | 11894.621 | 475.655   | RIG     | Parts of the city to regenerate | built before 1971 | 4                  | 161.586  | 2.35      | 0.588      | 11.111  |
| 94     | 36.467     | 18974.274 | 995.702   | RIG     | Parts of the city to regenerate | built before 1971 | 1                  | 126.142  | 1.94      | 1.940      | 3.030   |
| 95     | 40.525     | 8209.610  | 462.417   | RIG     | Parts of the city to regenerate | built before 1971 | 0                  | 0.000    | 0.00      | 0.000      | 0.000   |
| 96     | 40.805     | 8738.339  | 408.910   | RIG     | Parts of the city to regenerate | built before 1971 | 0                  | 0.000    | 0.00      | 0.000      | 0.000   |
| 97     | 33.947     | 8510.949  | 553.217   | RIG     | Parts of the city to regenerate | built before 1971 | 9                  | 114.959  | 3.95      | 0.439      | 24.324  |
| 99     | 41.409     | 12034.745 | 611.462   | RIG     | Parts of the city to regenerate | built before 1971 | 0                  | 0.000    | 0.00      | 0.000      | 0.000   |
| 100    | 47.533     | 22905.996 | 667.003   | RIG     | Parts of the city to regenerate | built before 1971 | 0                  | 0.000    | 0.00      | 0.000      | 0.000   |
| 101    | 44.887     | 12549.829 | 530.739   | RIG     | Parts of the city to regenerate | built before 1971 | 0                  | 0.000    | 0.00      | 0.000      | 0.000   |
| 102    | 32.916     | 15021.213 | 521.666   | RIG     | Parts of the city to regenerate | built before 1971 | 5                  | 125.920  | 2.20      | 0.440      | 16.667  |
| 103    | 31.247     | 23645.031 | 722.083   | RIG     | Parts of the city to regenerate | built before 1971 | 1                  | 150.010  | 1.90      | 1.900      | 4.167   |
| 105    | 37.094     | 12431.079 | 665.191   | RIG     | Parts of the city to regenerate | built before 1971 | 4                  | 106.988  | 2.81      | 0.703      | 12.500  |
| 107    | 38.660     | 19505.187 | 681.155   | RIG     | Parts of the city to regenerate | built before 1971 | 4                  | 208.749  | 2.58      | 0.645      | 12.903  |
| 108    | 43.855     | 9441.512  | 441.170   | RIG     | Parts of the city to regenerate | built before 1971 | 2                  | 222.645  | 4.79      | 2.395      | 15.385  |
| 109    | 32.479     | 26590.236 | 1353.142  | RIG     | Parts of the city to regenerate | built before 1971 | 10                 | 122.999  | 1.29      | 0.129      | 11.905  |
| 110    | 38.375     | 14276.318 | 727.907   | RIG     | Parts of the city to regenerate | built before 1971 | 0                  | 0.000    | 0.00      | 0.000      | 0.000   |
| 111    | 33.837     | 8707.074  | 664.383   | RIG     | Parts of the city to regenerate | built before 1971 | 5                  | 126.397  | 3.19      | 0.638      | 17.241  |
| 113    | 41.347     | 12344.504 | 483.828   | RIG     | Parts of the city to regenerate | built before 1971 | 0                  | 0.000    | 0.00      | 0.000      | 0.000   |
| 114    | 32.611     | 17494.690 | 612.498   | RIG     | Parts of the city to regenerate | built before 1971 | 4                  | 156.386  | 2.24      | 0.560      | 10.811  |
| 115    | 34.113     | 16088.879 | 975.986   | RIG     | Parts of the city to regenerate | built before 1971 | 0                  | 0.000    | 0.00      | 0.000      | 0.000   |
| 116    | 41.400     | 19257.457 | 757.974   | RIG     | Parts of the city to regenerate | built before 1971 | 9                  | 515.240  | 4.26      | 0.473      | 16.981  |
| 117    | 43.370     | 22354.479 | 773.228   | RIG     | Parts of the city to regenerate | built before 1971 | 0                  | 0.000    | 0.00      | 0.000      | 0.000   |
| 118    | 33.517     | 13033.840 | 564.105   | RIG     | Parts of the city to regenerate | built before 1971 | 0                  | 0.000    | 0.00      | 0.000      | 0.000   |
| 119    | 42.117     | 10759.833 | 668.079   | RIG     | Parts of the city to regenerate | built before 1971 | 1                  | 228.919  | 5.66      | 5.660      | 8.333   |
| 121    | 32.594     | 12073.267 | 454.398   | RIG     | Parts of the city to regenerate | built before 1971 | 5                  | 301.258  | 4.68      | 0.936      | 19.231  |
| 123    | 37.432     | 8816.124  | 379.649   | RIG     | Parts of the city to regenerate | built before 1971 | 5                  | 279.126  | 8.05      | 1.610      | 17.241  |
| 124    | 36.816     | 29588.830 | 1102.711  | RIG     | Parts of the city to regenerate | built before 1971 | 0                  | 0.000    | 0.00      | 0.000      | 0.000   |
| 125    | 37.156     | 11969.438 | 556.388   | RIG     | Parts of the city to regenerate | built before 1971 | 8                  | 289.913  | 4.90      | 0.613      | 21.053  |
| 127    | 36.758     | 15385.512 | 738.144   | RIG     | Parts of the city to regenerate | built before 1971 | 6                  | 308.782  | 6.84      | 1.140      | 17.143  |
| 128    | 35.557     | 11064.605 | 429.156   | RIG     | Parts of the city to regenerate | built before 1971 | 2                  | 238.878  | 7.17      | 3.585      | 10.526  |
| 130    | 36.021     | 9616.570  | 645.152   | RIG     | Parts of the city to regenerate | built before 1971 | 0                  | 0.000    | 0.00      | 0.000      | 0.000   |
| 132    | 36.905     | 14884.816 | 513.208   | RIG     | Parts of the city to regenerate | built before 1971 | 7                  | 196.055  | 2.73      | 0.390      | 12.281  |
| 133    | 32.997     | 19873.880 | 649.948   | RIG     | Parts of the city to regenerate | built before 1971 | 9                  | 63.311   | 0.74      | 0.082      | 18.367  |
| 134    | 31.425     | 8603.213  | 515.448   | RIG     | Parts of the city to regenerate | built before 1971 | 0                  | 0.000    | 0.00      | 0.000      | 0.000   |
| 135    | 34.385     | 11501.461 | 592.169   | RIG     | Parts of the city to regenerate | built before 1971 | 7                  | 185.051  | 3.33      | 0.476      | 15.556  |
| 139    | 36.061     | 14623.129 | 537.161   | RIG     | Parts of the city to regenerate | built before 1971 | 3                  | 155.370  | 2.39      | 0.797      | 7.692   |
| 140    | 31.090     | 8615.995  | 375.160   | RIG     | Parts of the city to regenerate | built before 1971 | 2                  | 479.011  | 13.83     | 6.915      | 11.765  |
| 141    | 31.985     | 8113.204  | 362.918   | RIG     | Parts of the city to regenerate | built before 1971 | 1                  | 485.995  | 14.19     | 14.190     | 9.091   |

| COD_UN | URBAN AREA |           |           |         |                                 |                   | LB=LISTED BUILDING |          |           |            |         |
|--------|------------|-----------|-----------|---------|---------------------------------|-------------------|--------------------|----------|-----------|------------|---------|
|        | GROUND_ALT | AREA_TERR | PERIMETER | COD_PUG | DEC_PUG                         | EPOCH             | No_LB              | COVER_LB | %_AREA_LB | %_AREA_1LB | %_No_LB |
| 142    | 32.512     | 8287.482  | 371.242   | RIG     | Parts of the city to regenerate | built before 1971 | 2                  | 522.646  | 13.32     | 6.660      | 9.524   |
| 143    | 34.262     | 17208.409 | 551.328   | RIG     | Parts of the city to regenerate | built before 1971 | 3                  | 331.493  | 5.35      | 1.783      | 6.250   |
| 144    | 34.608     | 10721.833 | 426.801   | RIG     | Parts of the city to regenerate | built before 1971 | 0                  | 0.000    | 0.00      | 0.000      | 0.000   |
| 145    | 36.347     | 8259.935  | 388.815   | RIG     | Parts of the city to regenerate | built before 1971 | 0                  | 0.000    | 0.00      | 0.000      | 0.000   |
| 147    | 25.793     | 13706.260 | 570.647   | RIG     | Parts of the city to regenerate | built before 1971 | 0                  | 0.000    | 0.00      | 0.000      | 0.000   |
| 148    | 26.667     | 11867.129 | 466.848   | RIG     | Parts of the city to regenerate | built before 1971 | 1                  | 65.665   | 1.33      | 1.330      | 4.348   |
| 149    | 34.131     | 10790.287 | 485.719   | RIG     | Parts of the city to regenerate | built before 1971 | 0                  | 0.000    | 0.00      | 0.000      | 0.000   |
| 150    | 32.420     | 10133.212 | 511.576   | RIG     | Parts of the city to regenerate | built before 1971 | 3                  | 68.671   | 2.03      | 0.677      | 11.538  |
| 151    | 30.146     | 21364.073 | 724.590   | RIG     | Parts of the city to regenerate | built before 1971 | 0                  | 0.000    | 0.00      | 0.000      | 0.000   |
| 152    | 33.940     | 11531.708 | 599.701   | RIG     | Parts of the city to regenerate | built before 1971 | 0                  | 0.000    | 0.00      | 0.000      | 0.000   |
| 153    | 31.138     | 39071.283 | 1102.552  | RIG     | Parts of the city to regenerate | built before 1971 | 0                  | 0.000    | 0.00      | 0.000      | 0.000   |
| 154    | 26.448     | 40830.088 | 884.699   | RIG     | Parts of the city to regenerate | built before 1971 | 4                  | 133.428  | 2.95      | 0.738      | 14.815  |
| 156    | 33.533     | 16920.500 | 622.708   | RIG     | Parts of the city to regenerate | built before 1971 | 1                  | 253.415  | 4.14      | 4.140      | 4.545   |
| 157    | 33.369     | 10569.022 | 686.097   | RIG     | Parts of the city to regenerate | built before 1971 | 0                  | 0.000    | 0.00      | 0.000      | 0.000   |
| 158    | 90.976     | 8858.730  | 612.061   | RIG     | Parts of the city to regenerate | built before 1971 | 2                  | 62.149   | 3.21      | 1.605      | 12.500  |
| 159    | 75.409     | 8224.638  | 665.435   | RIG     | Parts of the city to regenerate | built before 1971 | 1                  | 135.850  | 6.22      | 6.220      | 5.263   |
| 160    | 78.800     | 17034.757 | 533.862   | RIG     | Parts of the city to regenerate | built before 1971 | 0                  | 0.000    | 0.00      | 0.000      | 0.000   |
| 161    | 75.170     | 17481.130 | 942.524   | RIG     | Parts of the city to regenerate | built before 1971 | 0                  | 0.000    | 0.00      | 0.000      | 0.000   |
| 162    | 69.200     | 8079.450  | 468.987   | RIG     | Parts of the city to regenerate | built before 1971 | 0                  | 0.000    | 0.00      | 0.000      | 0.000   |
| 163    | 71.543     | 20023.804 | 844.879   | RIG     | Parts of the city to regenerate | built before 1971 | 0                  | 0.000    | 0.00      | 0.000      | 0.000   |
| 164    | 74.741     | 18970.420 | 799.355   | RIG     | Parts of the city to regenerate | built before 1971 | 0                  | 0.000    | 0.00      | 0.000      | 0.000   |
| 165    | 75.391     | 12334.789 | 651.714   | RIG     | Parts of the city to regenerate | built before 1971 | 0                  | 0.000    | 0.00      | 0.000      | 0.000   |
| 166    | 52.788     | 10311.875 | 695.478   | RIG     | Parts of the city to regenerate | built before 1971 | 0                  | 0.000    | 0.00      | 0.000      | 0.000   |
| 167    | 58.132     | 25159.213 | 1205.120  | RIG     | Parts of the city to regenerate | built before 1971 | 0                  | 0.000    | 0.00      | 0.000      | 0.000   |
| 169    | 60.267     | 20999.142 | 655.895   | RIG     | Parts of the city to regenerate | built before 1971 | 4                  | 202.271  | 2.33      | 0.583      | 15.385  |
| 170    | 61.500     | 8522.779  | 476.887   | RIG     | Parts of the city to regenerate | built before 1971 | 0                  | 0.000    | 0.00      | 0.000      | 0.000   |
| 171    | 56.597     | 12216.706 | 473.066   | RIG     | Parts of the city to regenerate | built before 1971 | 5                  | 57.144   | 1.30      | 0.260      | 16.129  |
| 172    | 51.710     | 8552.736  | 487.248   | RIG     | Parts of the city to regenerate | built before 1971 | 0                  | 0.000    | 0.00      | 0.000      | 0.000   |
| 173    | 47.431     | 12604.521 | 543.618   | RIG     | Parts of the city to regenerate | built before 1971 | 0                  | 0.000    | 0.00      | 0.000      | 0.000   |
| 174    | 54.410     | 27307.494 | 1445.631  | RIG     | Parts of the city to regenerate | built before 1971 | 15                 | 209.868  | 1.93      | 0.129      | 18.072  |
| 175    | 53.577     | 20357.697 | 600.233   | RIG     | Parts of the city to regenerate | built before 1971 | 3                  | 195.234  | 2.47      | 0.823      | 9.677   |
| 177    | 46.152     | 27255.665 | 1424.060  | RIG     | Parts of the city to regenerate | built before 1971 | 5                  | 315.224  | 4.48      | 0.896      | 17.241  |
| 178    | 45.604     | 24249.633 | 1385.604  | RIG     | Parts of the city to regenerate | built before 1971 | 1                  | 120.097  | 2.81      | 2.810      | 4.348   |
| 179    | 50.261     | 13176.211 | 991.870   | RIG     | Parts of the city to regenerate | built before 1971 | 2                  | 118.789  | 2.47      | 1.235      | 7.143   |
| 180    | 37.668     | 18038.231 | 686.736   | RIG     | Parts of the city to regenerate | built before 1971 | 0                  | 0.000    | 0.00      | 0.000      | 0.000   |
| 181    | 55.675     | 20215.601 | 1363.398  | RIG     | Parts of the city to regenerate | built before 1971 | 0                  | 0.000    | 0.00      | 0.000      | 0.000   |
| 184    | 47.876     | 35173.311 | 2183.344  | RIG     | Parts of the city to regenerate | built before 1971 | 5                  | 115.670  | 1.03      | 0.206      | 9.091   |
| 185    | 30.950     | 34802.183 | 837.268   | RIG     | Parts of the city to regenerate | built before 1971 | 2                  | 112.948  | 4.57      | 2.285      | 14.286  |
| 189    | 46.817     | 10141.189 | 654.627   | RIG     | Parts of the city to regenerate | built before 1971 | 1                  | 90.309   | 2.18      | 2.180      | 8.333   |
| 190    | 43.217     | 24760.179 | 1068.902  | RIG     | Parts of the city to regenerate | built before 1971 | 3                  | 125.082  | 1.65      | 0.550      | 7.317   |
| 191    | 45.200     | 11462.806 | 608.003   | RIG     | Parts of the city to regenerate | built before 1971 | 0                  | 0.000    | 0.00      | 0.000      | 0.000   |
| 192    | 39.350     | 13482.994 | 1259.684  | RIG     | Parts of the city to regenerate | built before 1971 | 1                  | 214.610  | 7.40      | 7.400      | 12.500  |
| 193    | 50.936     | 10284.654 | 523.249   | RIG     | Parts of the city to regenerate | built before 1971 | 1                  | 1.001    | 0.07      | 0.070      | 9.091   |
| 195    | 41.317     | 53377.309 | 1316.146  | RIG     | Parts of the city to regenerate | built before 1971 | 8                  | 224.535  | 1.64      | 0.205      | 15.094  |
| 196    | 48.225     | 11728.514 | 761.989   | RIG     | Parts of the city to regenerate | built before 1971 | 0                  | 0.000    | 0.00      | 0.000      | 0.000   |
| 197    | 31.391     | 21881.704 | 728.489   | RIG     | Parts of the city to regenerate | built before 1971 | 1                  | 309.649  | 8.97      | 8.970      | 6.667   |
| 199    | 45.767     | 8989.119  | 437.327   | RIG     | Parts of the city to regenerate | built before 1971 | 0                  | 0.000    | 0.00      | 0.000      | 0.000   |
| 200    | 30.676     | 18040.807 | 752.734   | RIG     | Parts of the city to regenerate | built before 1971 | 6                  | 292.069  | 5.04      | 0.840      | 25.000  |
| 202    | 30.429     | 13568.608 | 815.429   | RIG     | Parts of the city to regenerate | built before 1971 | 0                  | 0.000    | 0.00      | 0.000      | 0.000   |
| 203    | 43.733     | 8032.960  | 450.842   | RIG     | Parts of the city to regenerate | built before 1971 | 0                  | 0.000    | 0.00      | 0.000      | 0.000   |
| 205    | 39.967     | 8960.754  | 431.979   | RIG     | Parts of the city to regenerate | built before 1971 | 0                  | 0.000    | 0.00      | 0.000      | 0.000   |
| 206    | 39.590     | 16223.520 | 1169.386  | RIG     | Parts of the city to regenerate | built before 1971 | 0                  | 0.000    | 0.00      | 0.000      | 0.000   |
| 208    | 37.646     | 10086.813 | 592.754   | RIG     | Parts of the city to regenerate | built before 1971 | 0                  | 0.000    | 0.00      | 0.000      | 0.000   |
| 209    | 37.263     | 8484.461  | 619.128   | RIG     | Parts of the city to regenerate | built before 1971 | 0                  | 0.000    | 0.00      | 0.000      | 0.000   |
| 210    | 35.564     | 17693.220 | 789.927   | RIG     | Parts of the city to regenerate | built before 1971 | 0                  | 0.000    | 0.00      | 0.000      | 0.000   |

| COD_UN | URBAN AREA |           |           |         |                                 |                   | LB=LISTED BUILDING |          |           |            |         |
|--------|------------|-----------|-----------|---------|---------------------------------|-------------------|--------------------|----------|-----------|------------|---------|
|        | GROUND_ALT | AREA_TERR | PERIMETER | COD_PUG | DEC_PUG                         | EPOCH             | No_LB              | COVER_LB | %_AREA_LB | %_AREA_1LB | %_No_LB |
| 211    | 43.109     | 14670.622 | 846.594   | RIG     | Parts of the city to regenerate | built before 1971 | 3                  | 186.765  | 3.73      | 1.243      | 6.522   |
| 212    | 26.284     | 28943.549 | 1438.683  | RIG     | Parts of the city to regenerate | built before 1971 | 0                  | 0.000    | 0.00      | 0.000      | 0.000   |
| 213    | 41.875     | 13557.115 | 807.058   | RIG     | Parts of the city to regenerate | built before 1971 | 0                  | 0.000    | 0.00      | 0.000      | 0.000   |
| 214    | 17.742     | 16644.458 | 891.448   | RIG     | Parts of the city to regenerate | built before 1971 | 3                  | 928.202  | 29.60     | 9.867      | 21.429  |
| 217    | 30.421     | 49697.219 | 1443.432  | RIG     | Parts of the city to regenerate | built before 1971 | 11                 | 338.636  | 4.25      | 0.386      | 21.569  |
| 225    | 36.800     | 15578.056 | 594.468   | RIG     | Parts of the city to regenerate | built before 1971 | 1                  | 215.904  | 11.12     | 11.120     | 9.091   |
| 228    | 29.035     | 10264.897 | 462.774   | RIG     | Parts of the city to regenerate | built before 1971 | 0                  | 0.000    | 0.00      | 0.000      | 0.000   |
| 229    | 30.687     | 12355.090 | 664.924   | RIG     | Parts of the city to regenerate | built before 1971 | 0                  | 0.000    | 0.00      | 0.000      | 0.000   |
| 230    | 22.793     | 25856.507 | 878.971   | RIG     | Parts of the city to regenerate | built before 1971 | 3                  | 136.488  | 5.02      | 1.673      | 13.636  |
| 231    | 6.929      | 36107.154 | 939.233   | RIG     | Parts of the city to regenerate | built before 1971 | 4                  | 237.957  | 46.96     | 11.740     | 66.667  |
| 233    | 37.390     | 95755.644 | 3066.481  | RIG     | Parts of the city to regenerate | built before 1971 | 6                  | 23.348   | 0.64      | 0.107      | 17.143  |
| 235    | 71.714     | 14905.672 | 754.061   | RIG     | Parts of the city to regenerate | built before 1971 | 3                  | 450.589  | 9.80      | 3.267      | 14.286  |
| 236    | 54.855     | 10784.214 | 483.600   | RIG     | Parts of the city to regenerate | built before 1971 | 0                  | 0.000    | 0.00      | 0.000      | 0.000   |
| 237    | 66.887     | 47014.843 | 1413.454  | RIG     | Parts of the city to regenerate | built before 1971 | 4                  | 286.961  | 2.90      | 0.725      | 6.061   |
| 238    | 54.063     | 11724.005 | 561.779   | RIG     | Parts of the city to regenerate | built before 1971 | 3                  | 303.063  | 5.72      | 1.907      | 21.429  |
| 239    | 56.044     | 12401.260 | 923.381   | RIG     | Parts of the city to regenerate | built before 1971 | 4                  | 423.492  | 8.41      | 2.103      | 13.333  |
| 240    | 57.040     | 24417.686 | 954.530   | RIG     | Parts of the city to regenerate | built before 1971 | 0                  | 0.000    | 0.00      | 0.000      | 0.000   |
| 243    | 57.046     | 45019.193 | 2590.983  | RIG     | Parts of the city to regenerate | built before 1971 | 0                  | 0.000    | 0.00      | 0.000      | 0.000   |
| 244    | 47.127     | 38453.292 | 2042.653  | RIG     | Parts of the city to regenerate | built before 1971 | 1                  | 33.631   | 0.38      | 0.380      | 2.703   |
| 245    | 46.878     | 68495.606 | 1942.529  | RIG     | Parts of the city to regenerate | built before 1971 | 0                  | 0.000    | 0.00      | 0.000      | 0.000   |
| 247    | 39.647     | 12511.287 | 815.710   | RIG     | Parts of the city to regenerate | built before 1971 | 1                  | 69.899   | 1.70      | 1.700      | 3.333   |
| 250    | 30.970     | 35332.615 | 1735.063  | RIG     | Parts of the city to regenerate | built before 1971 | 7                  | 152.827  | 1.62      | 0.231      | 8.235   |
| 251    | 45.467     | 20710.968 | 1969.223  | RIG     | Parts of the city to regenerate | built before 1971 | 1                  | 12.686   | 0.71      | 0.710      | 20.000  |
| 252    | 39.029     | 19728.052 | 743.953   | RIG     | Parts of the city to regenerate | built before 1971 | 4                  | 168.100  | 2.30      | 0.575      | 14.286  |
| 253    | 25.367     | 27022.645 | 2140.316  | RIG     | Parts of the city to regenerate | built before 1971 | 2                  | 22.611   | 0.23      | 0.115      | 4.651   |
| 254    | 40.497     | 33002.725 | 1266.294  | RIG     | Parts of the city to regenerate | built before 1971 | 0                  | 0.000    | 0.00      | 0.000      | 0.000   |
| 255    | 23.857     | 10110.619 | 1301.695  | RIG     | Parts of the city to regenerate | built before 1971 | 2                  | 114.837  | 7.02      | 3.510      | 15.385  |
| 258    | 16.429     | 28450.895 | 905.473   | RIG     | Parts of the city to regenerate | built before 1971 | 1                  | 155.655  | 6.93      | 6.930      | 16.667  |
| 262    | 34.039     | 8671.912  | 543.964   | RIG     | Parts of the city to regenerate | built before 1971 | 5                  | 91.422   | 3.58      | 0.716      | 18.519  |
| 263    | 22.209     | 11029.424 | 1003.375  | RIG     | Parts of the city to regenerate | built before 1971 | 0                  | 0.000    | 0.00      | 0.000      | 0.000   |
| 265    | 32.506     | 21912.343 | 884.286   | RIG     | Parts of the city to regenerate | built before 1971 | 4                  | 1831.916 | 33.24     | 8.310      | 16.000  |
| 268    | 34.739     | 8621.828  | 597.683   | RIG     | Parts of the city to regenerate | built before 1971 | 7                  | 132.736  | 4.48      | 0.640      | 22.581  |
| 269    | 29.919     | 17703.171 | 678.846   | RIG     | Parts of the city to regenerate | built before 1971 | 2                  | 272.487  | 7.89      | 3.945      | 5.263   |
| 271    | 25.133     | 14933.174 | 730.666   | RIG     | Parts of the city to regenerate | built before 1971 | 0                  | 0.000    | 0.00      | 0.000      | 0.000   |
| 272    | 15.964     | 9437.595  | 433.821   | RIG     | Parts of the city to regenerate | built before 1971 | 2                  | 183.090  | 12.44     | 6.220      | 28.571  |
| 273    | 36.540     | 14054.870 | 997.178   | RIG     | Parts of the city to regenerate | built before 1971 | 0                  | 0.000    | 0.00      | 0.000      | 0.000   |
| 274    | 38.573     | 12999.460 | 690.459   | RIG     | Parts of the city to regenerate | built before 1971 | 0                  | 0.000    | 0.00      | 0.000      | 0.000   |
| 277    | 40.431     | 30410.486 | 885.899   | RIG     | Parts of the city to regenerate | built before 1971 | 5                  | 8487.926 | 65.63     | 13.126     | 17.241  |
| 279    | 42.714     | 14598.519 | 951.902   | RIG     | Parts of the city to regenerate | built before 1971 | 7                  | 223.416  | 2.42      | 0.346      | 18.919  |
| 280    | 33.767     | 8425.904  | 486.716   | RIG     | Parts of the city to regenerate | built before 1971 | 0                  | 0.000    | 0.00      | 0.000      | 0.000   |
| 281    | 46.158     | 18231.016 | 908.934   | RIG     | Parts of the city to regenerate | built before 1971 | 2                  | 133.319  | 3.02      | 1.510      | 6.897   |
| 282    | 41.715     | 35655.751 | 998.373   | RIG     | Parts of the city to regenerate | built before 1971 | 8                  | 482.835  | 3.28      | 0.410      | 17.391  |
| 283    | 55.041     | 49372.467 | 954.353   | RIG     | Parts of the city to regenerate | built before 1971 | 2                  | 670.674  | 4.65      | 2.325      | 3.636   |
| 284    | 79.939     | 12979.967 | 507.408   | RIG     | Parts of the city to regenerate | built before 1971 | 2                  | 68.365   | 1.49      | 0.745      | 11.111  |
| 285    | 58.372     | 8219.266  | 721.798   | RIG     | Parts of the city to regenerate | built before 1971 | 1                  | 90.954   | 3.21      | 3.210      | 6.250   |



| COD_UN | No._TOT | ENTIRE BUILDING STOCK |              |            |           |       |       |       |       | AVRG_NF |
|--------|---------|-----------------------|--------------|------------|-----------|-------|-------|-------|-------|---------|
|        |         | COVER_TOT             | AVRG. HEIGHT | VOL_TOT    | COVERXNF  | FSI   | GSI   | OSR_2 | L     |         |
| 0      | 18      | 3120.806              | 12.050       | 47780.886  | 12759.475 | 1.298 | 0.317 | 0.526 | 4.095 | 3       |
| 1      | 8       | 4021.655              | 13.688       | 59266.042  | 17705.729 | 1.033 | 0.235 | 0.741 | 4.396 | 4       |
| 2      | 11      | 2024.134              | 17.355       | 33466.985  | 9634.055  | 0.990 | 0.208 | 0.800 | 4.760 | 5       |
| 3      | 33      | 7607.407              | 17.752       | 142460.700 | 40707.904 | 1.931 | 0.361 | 0.331 | 5.349 | 5       |
| 4      | 23      | 3195.680              | 16.070       | 50431.699  | 14159.557 | 1.562 | 0.353 | 0.414 | 4.425 | 5       |
| 5      | 16      | 3934.396              | 14.625       | 66261.715  | 18952.823 | 2.062 | 0.428 | 0.277 | 4.818 | 4       |
| 6      | 7       | 3475.909              | 16.086       | 56348.260  | 15062.964 | 1.707 | 0.394 | 0.355 | 4.332 | 4       |
| 7      | 32      | 5945.883              | 17.175       | 101268.913 | 28860.072 | 1.566 | 0.323 | 0.432 | 4.848 | 5       |
| 8      | 15      | 2442.800              | 24.647       | 62555.300  | 18097.046 | 1.312 | 0.177 | 0.627 | 7.412 | 7       |
| 9      | 22      | 3943.275              | 10.305       | 48494.918  | 13400.662 | 1.243 | 0.366 | 0.510 | 3.396 | 3       |
| 11     | 82      | 11121.490             | 10.840       | 135582.482 | 38845.893 | 1.073 | 0.307 | 0.646 | 3.495 | 3       |
| 12     | 30      | 7703.531              | 11.260       | 111686.454 | 32091.863 | 1.716 | 0.412 | 0.343 | 4.165 | 3       |
| 13     | 22      | 4897.774              | 15.645       | 75773.409  | 20950.700 | 2.082 | 0.487 | 0.246 | 4.275 | 4       |
| 16     | 22      | 4473.242              | 9.405        | 42660.608  | 11457.012 | 1.124 | 0.439 | 0.499 | 2.560 | 3       |
| 17     | 35      | 6275.938              | 13.580       | 102676.172 | 29667.886 | 1.796 | 0.380 | 0.345 | 4.726 | 4       |
| 19     | 101     | 14836.235             | 8.683        | 160312.293 | 45330.282 | 1.170 | 0.383 | 0.527 | 3.055 | 3       |
| 20     | 42      | 6409.149              | 15.288       | 110102.022 | 31886.821 | 2.036 | 0.409 | 0.290 | 4.978 | 4       |
| 22     | 40      | 7091.971              | 11.622       | 133139.871 | 37860.842 | 2.173 | 0.407 | 0.273 | 5.339 | 3       |
| 23     | 20      | 7267.826              | 14.980       | 158266.148 | 44761.485 | 2.521 | 0.409 | 0.234 | 6.164 | 4       |
| 24     | 25      | 2840.435              | 12.268       | 35407.173  | 9948.142  | 1.064 | 0.304 | 0.654 | 3.500 | 3       |
| 25     | 30      | 5212.284              | 11.967       | 81242.006  | 22690.134 | 1.650 | 0.379 | 0.376 | 4.354 | 3       |
| 26     | 14      | 2721.715              | 15.721       | 54706.602  | 15615.276 | 1.859 | 0.324 | 0.364 | 5.738 | 4       |
| 27     | 23      | 2593.087              | 7.239        | 23508.378  | 6598.569  | 0.753 | 0.296 | 0.935 | 2.544 | 2       |
| 28     | 58      | 8527.336              | 9.048        | 96133.212  | 25871.997 | 1.089 | 0.359 | 0.589 | 3.033 | 2       |
| 29     | 31      | 7143.825              | 21.852       | 145975.597 | 42083.622 | 3.262 | 0.554 | 0.137 | 5.888 | 6       |
| 30     | 14      | 3309.415              | 17.907       | 50813.015  | 18695.981 | 2.300 | 0.407 | 0.258 | 5.651 | 5       |
| 31     | 23      | 4321.203              | 13.013       | 62784.374  | 17515.042 | 1.518 | 0.374 | 0.412 | 4.059 | 4       |
| 32     | 27      | 4603.831              | 16.207       | 73917.213  | 20815.101 | 1.920 | 0.425 | 0.299 | 4.518 | 5       |
| 33     | 52      | 6433.656              | 12.198       | 71888.307  | 20042.730 | 1.148 | 0.369 | 0.550 | 3.111 | 3       |
| 34     | 74      | 7869.268              | 10.622       | 87743.782  | 24653.619 | 0.999 | 0.319 | 0.682 | 3.132 | 3       |
| 35     | 26      | 3947.790              | 11.015       | 47725.350  | 12925.186 | 1.184 | 0.362 | 0.539 | 3.271 | 3       |
| 36     | 31      | 5040.968              | 16.426       | 83571.727  | 23438.510 | 2.071 | 0.445 | 0.268 | 4.654 | 5       |
| 37     | 26      | 4385.142              | 9.681        | 54582.617  | 14570.898 | 1.401 | 0.421 | 0.413 | 3.328 | 3       |
| 38     | 45      | 5797.940              | 7.898        | 57131.127  | 15790.153 | 1.037 | 0.381 | 0.597 | 2.722 | 2       |
| 39     | 23      | 7757.521              | 28.265       | 205901.512 | 58803.786 | 1.581 | 0.209 | 0.500 | 7.565 | 8       |
| 40     | 25      | 3674.454              | 13.168       | 59734.501  | 16199.388 | 1.713 | 0.388 | 0.357 | 4.415 | 4       |
| 41     | 24      | 6343.615              | 16.888       | 101131.458 | 28849.446 | 2.440 | 0.537 | 0.190 | 4.544 | 5       |
| 42     | 46      | 10053.218             | 14.124       | 162973.605 | 46401.916 | 1.828 | 0.396 | 0.330 | 4.616 | 4       |
| 44     | 18      | 3559.923              | 11.661       | 52262.985  | 15869.832 | 1.511 | 0.339 | 0.437 | 4.457 | 4       |
| 46     | 23      | 4731.981              | 14.391       | 86204.479  | 24312.316 | 1.528 | 0.297 | 0.460 | 5.145 | 4       |
| 47     | 29      | 8253.969              | 26.179       | 203333.348 | 57909.789 | 1.660 | 0.237 | 0.460 | 7.004 | 8       |
| 48     | 36      | 5104.469              | 12.222       | 66447.704  | 18542.072 | 1.190 | 0.328 | 0.565 | 3.628 | 3       |
| 49     | 15      | 3520.150              | 11.480       | 52011.455  | 14573.698 | 1.596 | 0.386 | 0.385 | 4.135 | 3       |
| 50     | 30      | 5271.402              | 16.007       | 93766.781  | 26358.648 | 2.012 | 0.402 | 0.297 | 5.005 | 5       |
| 51     | 51      | 9616.455              | 13.012       | 148487.210 | 42664.233 | 1.680 | 0.379 | 0.370 | 4.433 | 4       |
| 52     | 19      | 6635.531              | 14.916       | 115931.846 | 32473.895 | 2.106 | 0.430 | 0.271 | 4.898 | 4       |
| 56     | 9       | 2584.619              | 13.122       | 48671.844  | 14738.602 | 1.412 | 0.248 | 0.533 | 5.694 | 4       |
| 57     | 17      | 2488.650              | 16.788       | 41414.348  | 12204.625 | 1.505 | 0.307 | 0.460 | 4.902 | 5       |
| 58     | 18      | 3793.451              | 11.683       | 60558.899  | 17315.673 | 1.449 | 0.318 | 0.471 | 4.557 | 3       |
| 60     | 17      | 2221.694              | 7.229        | 19570.101  | 5422.361  | 0.537 | 0.220 | 1.453 | 2.441 | 2       |
| 62     | 23      | 4910.315              | 12.035       | 69875.916  | 20260.797 | 1.810 | 0.439 | 0.310 | 4.123 | 3       |
| 64     | 30      | 3899.728              | 10.730       | 53536.113  | 15291.670 | 1.169 | 0.298 | 0.601 | 3.923 | 3       |
| 67     | 28      | 3652.446              | 13.021       | 49750.307  | 13884.257 | 1.288 | 0.339 | 0.513 | 3.799 | 4       |
| 68     | 20      | 3516.934              | 12.885       | 47742.041  | 13910.583 | 1.472 | 0.372 | 0.427 | 3.957 | 4       |
| 70     | 15      | 5033.150              | 11.327       | 90095.939  | 25238.242 | 2.334 | 0.465 | 0.229 | 5.019 | 3       |

| COD_UN | No_TOT | ENTIRE BUILDING STOCK |              |            |           |       |       |       |       |   |  | AVRG_NF |
|--------|--------|-----------------------|--------------|------------|-----------|-------|-------|-------|-------|---|--|---------|
|        |        | COVER_TOT             | AVRG. HEIGHT | VOL_TOT    | COVERXNF  | FSI   | GSI   | OSR_2 | L     |   |  |         |
| 71     | 24     | 3762.711              | 8.371        | 50883.385  | 14279.325 | 1.590 | 0.419 | 0.365 | 3.795 | 2 |  |         |
| 73     | 13     | 2878.126              | 10.292       | 33778.202  | 9857.349  | 1.214 | 0.354 | 0.532 | 3.429 | 3 |  |         |
| 74     | 21     | 2965.520              | 8.948        | 29916.721  | 8639.021  | 1.078 | 0.370 | 0.584 | 2.914 | 3 |  |         |
| 75     | 11     | 2164.047              | 9.509        | 25781.447  | 7132.195  | 0.743 | 0.225 | 1.043 | 3.302 | 3 |  |         |
| 76     | 39     | 5986.000              | 7.069        | 50650.702  | 13740.391 | 0.952 | 0.415 | 0.614 | 2.294 | 2 |  |         |
| 77     | 46     | 6378.853              | 8.054        | 66014.495  | 19078.819 | 0.951 | 0.318 | 0.717 | 2.991 | 2 |  |         |
| 78     | 18     | 2879.332              | 8.700        | 28231.168  | 7534.815  | 0.911 | 0.348 | 0.716 | 2.618 | 2 |  |         |
| 79     | 20     | 2677.343              | 8.560        | 26275.828  | 7128.091  | 0.820 | 0.308 | 0.844 | 2.662 | 2 |  |         |
| 80     | 40     | 5239.525              | 8.168        | 57304.088  | 15009.660 | 0.721 | 0.252 | 1.037 | 2.861 | 2 |  |         |
| 81     | 26     | 3547.223              | 12.231       | 49078.668  | 14164.091 | 0.879 | 0.220 | 0.887 | 3.995 | 4 |  |         |
| 82     | 10     | 3297.028              | 14.930       | 56409.491  | 16779.796 | 1.900 | 0.373 | 0.330 | 5.094 | 4 |  |         |
| 83     | 14     | 1831.055              | 24.750       | 38415.014  | 10885.231 | 1.113 | 0.187 | 0.730 | 5.952 | 7 |  |         |
| 85     | 18     | 3525.309              | 12.344       | 51320.681  | 14780.448 | 1.652 | 0.394 | 0.367 | 4.193 | 4 |  |         |
| 86     | 10     | 5097.423              | 11.320       | 71978.215  | 20197.184 | 2.189 | 0.553 | 0.204 | 3.958 | 3 |  |         |
| 87     | 24     | 4214.210              | 12.604       | 55524.298  | 14295.354 | 1.324 | 0.390 | 0.461 | 3.395 | 4 |  |         |
| 88     | 21     | 5437.584              | 15.100       | 92550.210  | 26619.071 | 2.182 | 0.446 | 0.254 | 4.892 | 4 |  |         |
| 89     | 14     | 2675.226              | 13.629       | 38445.690  | 11230.351 | 0.891 | 0.212 | 0.884 | 4.203 | 4 |  |         |
| 92     | 23     | 3833.306              | 13.617       | 69181.119  | 20095.808 | 1.854 | 0.354 | 0.348 | 5.237 | 4 |  |         |
| 93     | 36     | 6880.176              | 14.375       | 129368.305 | 37801.756 | 3.178 | 0.578 | 0.133 | 5.498 | 4 |  |         |
| 94     | 33     | 6503.787              | 15.770       | 118070.271 | 33501.577 | 1.766 | 0.343 | 0.372 | 5.149 | 4 |  |         |
| 95     | 13     | 2759.211              | 11.077       | 40630.466  | 11939.630 | 1.454 | 0.336 | 0.457 | 4.327 | 3 |  |         |
| 96     | 24     | 3118.460              | 11.200       | 48052.811  | 10896.344 | 1.247 | 0.357 | 0.516 | 3.493 | 3 |  |         |
| 97     | 37     | 2907.614              | 6.176        | 21739.598  | 6023.362  | 0.708 | 0.342 | 0.929 | 2.070 | 2 |  |         |
| 99     | 12     | 2817.735              | 13.017       | 36693.042  | 9583.298  | 0.796 | 0.234 | 0.962 | 3.402 | 4 |  |         |
| 100    | 15     | 4202.924              | 16.167       | 69430.060  | 20505.237 | 0.895 | 0.183 | 0.913 | 4.891 | 5 |  |         |
| 101    | 24     | 6942.744              | 14.054       | 112985.342 | 31646.388 | 2.522 | 0.553 | 0.177 | 4.561 | 4 |  |         |
| 102    | 30     | 5717.246              | 12.037       | 77795.389  | 21791.640 | 1.451 | 0.381 | 0.427 | 3.808 | 3 |  |         |
| 103    | 24     | 7886.693              | 15.546       | 140983.412 | 40061.607 | 1.694 | 0.334 | 0.393 | 5.072 | 4 |  |         |
| 105    | 32     | 3806.037              | 8.903        | 50704.363  | 14268.791 | 1.148 | 0.306 | 0.605 | 3.752 | 3 |  |         |
| 107    | 31     | 8078.574              | 10.252       | 98854.730  | 28187.271 | 1.445 | 0.414 | 0.406 | 3.490 | 3 |  |         |
| 108    | 13     | 4644.892              | 19.608       | 76924.345  | 21895.793 | 2.319 | 0.492 | 0.219 | 4.713 | 6 |  |         |
| 109    | 84     | 9509.404              | 7.108        | 90408.251  | 25073.337 | 0.943 | 0.358 | 0.681 | 2.634 | 2 |  |         |
| 110    | 38     | 6071.478              | 12.126       | 71940.951  | 19559.002 | 1.370 | 0.425 | 0.420 | 3.224 | 3 |  |         |
| 111    | 29     | 3963.497              | 9.328        | 53370.324  | 14964.818 | 1.719 | 0.455 | 0.317 | 3.778 | 3 |  |         |
| 113    | 18     | 6481.588              | 15.922       | 87111.646  | 25159.044 | 2.038 | 0.525 | 0.233 | 3.882 | 5 |  |         |
| 114    | 37     | 6970.721              | 7.224        | 55740.323  | 14854.625 | 0.849 | 0.398 | 0.709 | 2.133 | 2 |  |         |
| 115    | 36     | 7078.780              | 9.725        | 83183.216  | 23129.999 | 1.438 | 0.440 | 0.389 | 3.268 | 3 |  |         |
| 116    | 53     | 12094.464             | 22.877       | 190463.426 | 55419.901 | 2.878 | 0.628 | 0.129 | 4.583 | 7 |  |         |
| 117    | 43     | 9709.336              | 11.028       | 154427.196 | 42638.591 | 1.907 | 0.434 | 0.297 | 4.394 | 3 |  |         |
| 118    | 20     | 4155.328              | 10.330       | 48623.527  | 13849.689 | 1.063 | 0.319 | 0.641 | 3.332 | 3 |  |         |
| 119    | 12     | 4040.962              | 14.492       | 72091.372  | 20695.909 | 1.923 | 0.376 | 0.324 | 5.114 | 4 |  |         |
| 121    | 26     | 6438.098              | 11.300       | 90817.086  | 25333.080 | 2.098 | 0.533 | 0.223 | 3.936 | 3 |  |         |
| 123    | 29     | 3467.409              | 9.869        | 46649.263  | 12793.340 | 1.451 | 0.393 | 0.418 | 3.692 | 3 |  |         |
| 124    | 47     | 11119.948             | 11.196       | 153794.290 | 43145.270 | 1.458 | 0.376 | 0.428 | 3.878 | 3 |  |         |
| 125    | 38     | 5913.549              | 9.289        | 68487.743  | 19501.818 | 1.629 | 0.494 | 0.311 | 3.298 | 3 |  |         |
| 127    | 35     | 4513.628              | 9.091        | 57261.996  | 16844.857 | 1.095 | 0.293 | 0.646 | 3.737 | 3 |  |         |
| 128    | 19     | 3333.195              | 10.521       | 43308.386  | 11954.170 | 1.080 | 0.301 | 0.647 | 3.588 | 3 |  |         |
| 130    | 31     | 4506.935              | 14.297       | 71510.608  | 20476.142 | 2.129 | 0.469 | 0.249 | 4.539 | 4 |  |         |
| 132    | 57     | 7177.844              | 9.082        | 82509.268  | 23262.265 | 1.563 | 0.482 | 0.331 | 3.243 | 3 |  |         |
| 133    | 49     | 8526.962              | 8.580        | 92570.860  | 25444.803 | 1.280 | 0.429 | 0.446 | 2.984 | 2 |  |         |
| 134    | 14     | 4022.849              | 11.093       | 41398.289  | 11153.129 | 1.296 | 0.468 | 0.410 | 2.769 | 3 |  |         |
| 135    | 45     | 5560.206              | 9.560        | 67708.656  | 18766.758 | 1.632 | 0.483 | 0.317 | 3.379 | 3 |  |         |
| 139    | 39     | 6487.598              | 8.685        | 68604.809  | 18371.918 | 1.256 | 0.444 | 0.443 | 2.829 | 2 |  |         |
| 140    | 17     | 3462.935              | 11.088       | 51069.889  | 14321.740 | 1.662 | 0.402 | 0.360 | 4.134 | 3 |  |         |
| 141    | 11     | 3426.089              | 12.500       | 54347.142  | 15095.593 | 1.861 | 0.422 | 0.311 | 4.410 | 4 |  |         |

| COD_UN | No_TOT | ENTIRE BUILDING STOCK |              |            |           |       |       |       |       |         |  |
|--------|--------|-----------------------|--------------|------------|-----------|-------|-------|-------|-------|---------|--|
|        |        | COVER_TOT             | AVRG. HEIGHT | VOL_TOT    | COVERXNF  | FSI   | GSI   | OSR_2 | L     | AVRG_NF |  |
| 142    | 21     | 3923.204              | 9.371        | 48908.189  | 13334.853 | 1.609 | 0.473 | 0.328 | 3.402 | 3       |  |
| 143    | 48     | 6197.005              | 8.015        | 72603.127  | 20424.638 | 1.187 | 0.360 | 0.539 | 3.297 | 2       |  |
| 144    | 22     | 4742.760              | 9.991        | 68171.353  | 19558.360 | 1.824 | 0.442 | 0.306 | 4.127 | 3       |  |
| 145    | 18     | 2927.753              | 12.933       | 44396.306  | 12586.584 | 1.524 | 0.354 | 0.424 | 4.305 | 4       |  |
| 147    | 20     | 6156.310              | 8.790        | 52769.244  | 14870.532 | 1.085 | 0.449 | 0.508 | 2.416 | 2       |  |
| 148    | 23     | 4946.203              | 9.030        | 59175.547  | 16220.294 | 1.367 | 0.417 | 0.426 | 3.278 | 3       |  |
| 149    | 29     | 4441.317              | 9.683        | 60090.061  | 16541.714 | 1.533 | 0.412 | 0.384 | 3.721 | 3       |  |
| 150    | 26     | 3390.402              | 8.542        | 36022.973  | 10048.509 | 0.992 | 0.335 | 0.670 | 2.961 | 2       |  |
| 151    | 40     | 8645.677              | 9.530        | 91868.884  | 25128.938 | 1.176 | 0.405 | 0.506 | 2.904 | 3       |  |
| 152    | 32     | 3732.416              | 8.344        | 39324.766  | 11124.796 | 0.965 | 0.324 | 0.701 | 2.978 | 2       |  |
| 153    | 57     | 13387.302             | 9.926        | 158296.150 | 44499.669 | 1.139 | 0.343 | 0.577 | 3.321 | 3       |  |
| 154    | 27     | 4517.330              | 6.237        | 29997.517  | 7726.241  | 0.189 | 0.111 | 4.704 | 1.703 | 2       |  |
| 156    | 22     | 6118.447              | 11.709       | 84776.199  | 23545.664 | 1.392 | 0.362 | 0.458 | 3.845 | 3       |  |
| 157    | 12     | 2355.856              | 11.450       | 32478.425  | 9314.652  | 0.881 | 0.223 | 0.882 | 3.951 | 3       |  |
| 158    | 16     | 1939.019              | 9.656        | 26438.587  | 6194.451  | 0.699 | 0.219 | 1.117 | 3.192 | 3       |  |
| 159    | 19     | 2185.321              | 9.063        | 24489.376  | 6260.098  | 0.761 | 0.266 | 0.965 | 2.861 | 3       |  |
| 160    | 8      | 3680.693              | 14.275       | 57121.463  | 16986.280 | 0.997 | 0.216 | 0.786 | 4.616 | 4       |  |
| 161    | 29     | 4701.071              | 17.179       | 78061.186  | 23331.248 | 1.335 | 0.269 | 0.548 | 4.963 | 5       |  |
| 162    | 8      | 1522.901              | 31.663       | 46429.079  | 13740.848 | 1.701 | 0.188 | 0.477 | 9.048 | 9       |  |
| 163    | 21     | 2718.543              | 27.186       | 70660.421  | 20544.211 | 1.026 | 0.136 | 0.842 | 7.544 | 8       |  |
| 164    | 21     | 5142.834              | 20.224       | 125793.727 | 35791.753 | 1.887 | 0.271 | 0.386 | 6.963 | 6       |  |
| 165    | 10     | 3231.674              | 11.630       | 43499.945  | 11631.142 | 0.943 | 0.262 | 0.783 | 3.599 | 3       |  |
| 166    | 13     | 3520.903              | 15.685       | 55612.813  | 15792.848 | 1.532 | 0.341 | 0.430 | 4.493 | 4       |  |
| 167    | 28     | 6385.483              | 11.268       | 86447.331  | 23016.593 | 0.915 | 0.254 | 0.815 | 3.602 | 3       |  |
| 169    | 26     | 8672.852              | 16.146       | 145401.230 | 40952.157 | 1.950 | 0.413 | 0.301 | 4.722 | 5       |  |
| 170    | 3      | 1647.381              | 30.600       | 50461.012  | 14826.429 | 1.740 | 0.193 | 0.464 | 9.016 | 9       |  |
| 171    | 31     | 4399.126              | 8.442        | 37617.064  | 10204.075 | 0.835 | 0.360 | 0.766 | 2.319 | 2       |  |
| 172    | 28     | 3690.806              | 6.718        | 35425.066  | 9972.888  | 1.166 | 0.432 | 0.487 | 2.699 | 2       |  |
| 173    | 37     | 5716.817              | 8.195        | 55369.728  | 14604.278 | 1.159 | 0.454 | 0.471 | 2.553 | 2       |  |
| 174    | 83     | 10848.789             | 9.104        | 124731.388 | 35639.686 | 1.305 | 0.397 | 0.462 | 3.287 | 3       |  |
| 175    | 31     | 7905.920              | 17.374       | 130653.957 | 37258.167 | 1.830 | 0.388 | 0.334 | 4.716 | 5       |  |
| 177    | 29     | 7039.953              | 12.128       | 117525.800 | 33591.549 | 1.232 | 0.258 | 0.602 | 4.775 | 3       |  |
| 178    | 23     | 4277.564              | 19.352       | 89697.522  | 25710.881 | 1.060 | 0.176 | 0.777 | 6.023 | 6       |  |
| 179    | 28     | 4799.950              | 14.875       | 76021.577  | 21122.869 | 1.603 | 0.364 | 0.397 | 4.404 | 4       |  |
| 180    | 21     | 8989.174              | 6.743        | 77589.183  | 17383.448 | 0.964 | 0.498 | 0.521 | 1.936 | 2       |  |
| 181    | 39     | 7055.414              | 14.421       | 124090.955 | 33880.165 | 1.676 | 0.349 | 0.388 | 4.802 | 4       |  |
| 184    | 55     | 11210.093             | 15.178       | 212718.215 | 61093.004 | 1.737 | 0.319 | 0.392 | 5.445 | 4       |  |
| 185    | 14     | 2469.287              | 7.136        | 22672.510  | 6379.206  | 0.183 | 0.071 | 5.077 | 2.577 | 2       |  |
| 189    | 12     | 4133.351              | 15.550       | 89785.712  | 18335.583 | 1.808 | 0.408 | 0.327 | 4.431 | 4       |  |
| 190    | 41     | 7579.427              | 13.305       | 118847.640 | 30993.162 | 1.252 | 0.306 | 0.554 | 4.092 | 4       |  |
| 191    | 21     | 3677.157              | 10.914       | 55660.767  | 13255.889 | 1.156 | 0.321 | 0.587 | 3.601 | 3       |  |
| 192    | 8      | 2901.188              | 10.338       | 37637.054  | 10621.786 | 0.788 | 0.215 | 0.996 | 3.665 | 3       |  |
| 193    | 11     | 1407.926              | 10.409       | 20418.501  | 4823.006  | 0.469 | 0.137 | 1.840 | 3.423 | 3       |  |
| 195    | 53     | 13672.577             | 13.558       | 253241.177 | 72639.387 | 1.361 | 0.256 | 0.547 | 5.316 | 4       |  |
| 196    | 24     | 3681.030              | 11.450       | 44398.121  | 12872.445 | 1.098 | 0.314 | 0.625 | 3.497 | 3       |  |
| 197    | 15     | 3451.380              | 11.933       | 68479.939  | 19576.429 | 0.895 | 0.158 | 0.941 | 5.665 | 3       |  |
| 199    | 14     | 3318.065              | 13.450       | 54923.646  | 15179.251 | 1.689 | 0.369 | 0.374 | 4.577 | 4       |  |
| 200    | 24     | 5800.082              | 15.429       | 135406.172 | 39418.759 | 2.185 | 0.321 | 0.311 | 6.807 | 4       |  |
| 202    | 32     | 4240.589              | 9.775        | 42080.276  | 11514.020 | 0.849 | 0.313 | 0.809 | 2.712 | 3       |  |
| 203    | 14     | 4800.438              | 13.071       | 77044.296  | 21843.227 | 2.719 | 0.598 | 0.148 | 4.547 | 4       |  |
| 205    | 14     | 4799.317              | 11.236       | 60126.606  | 16200.232 | 1.808 | 0.536 | 0.257 | 3.373 | 3       |  |
| 206    | 32     | 6117.517              | 9.234        | 76343.943  | 21441.440 | 1.322 | 0.377 | 0.471 | 3.507 | 3       |  |
| 208    | 25     | 4208.742              | 9.628        | 56344.462  | 16352.248 | 1.621 | 0.417 | 0.360 | 3.887 | 3       |  |
| 209    | 38     | 3975.133              | 6.845        | 29264.830  | 7835.287  | 0.923 | 0.469 | 0.575 | 1.968 | 2       |  |
| 210    | 57     | 6852.030              | 6.651        | 56085.290  | 15727.336 | 0.889 | 0.387 | 0.690 | 2.297 | 2       |  |

| COD_UN | No_TOT | ENTIRE BUILDING STOCK |              |            |           |       |       |        |       |         |  |  |
|--------|--------|-----------------------|--------------|------------|-----------|-------|-------|--------|-------|---------|--|--|
|        |        | COVER_TOT             | AVRG. HEIGHT | VOL_TOT    | COVERXNF  | FSI   | GSI   | OSR_2  | L     | AVRG_NF |  |  |
| 211    | 46     | 5008.161              | 7.430        | 39422.775  | 10981.592 | 0.749 | 0.341 | 0.880  | 2.196 | 2       |  |  |
| 212    | 25     | 7822.336              | 10.516       | 73906.537  | 20059.127 | 0.693 | 0.270 | 1.053  | 2.567 | 3       |  |  |
| 213    | 27     | 4852.376              | 10.578       | 53645.961  | 15076.275 | 1.112 | 0.358 | 0.577  | 3.106 | 3       |  |  |
| 214    | 14     | 3136.230              | 8.493        | 48906.504  | 8858.014  | 0.532 | 0.188 | 1.526  | 2.830 | 2       |  |  |
| 217    | 51     | 7968.930              | 11.344       | 101503.206 | 30161.584 | 0.607 | 0.160 | 1.384  | 3.794 | 3       |  |  |
| 225    | 11     | 1942.219              | 21.427       | 51834.795  | 14890.911 | 0.956 | 0.125 | 0.915  | 7.648 | 6       |  |  |
| 228    | 16     | 2571.237              | 13.581       | 66009.664  | 14430.405 | 1.406 | 0.250 | 0.533  | 5.624 | 4       |  |  |
| 229    | 26     | 5000.287              | 8.892        | 56733.541  | 14865.068 | 1.203 | 0.405 | 0.495  | 2.970 | 3       |  |  |
| 230    | 22     | 2718.554              | 5.727        | 18002.287  | 5157.237  | 0.199 | 0.105 | 4.497  | 1.895 | 2       |  |  |
| 231    | 6      | 506.761               | 5.700        | 4636.125   | 948.899   | 0.026 | 0.014 | 37.923 | 1.857 | 2       |  |  |
| 233    | 35     | 3673.381              | 5.589        | 28984.250  | 7903.371  | 0.083 | 0.038 | 11.590 | 2.184 | 2       |  |  |
| 235    | 21     | 4596.038              | 25.738       | 79321.919  | 22143.054 | 1.486 | 0.308 | 0.466  | 4.825 | 7       |  |  |
| 236    | 9      | 3592.595              | 21.400       | 63667.663  | 16915.513 | 1.569 | 0.333 | 0.425  | 4.712 | 6       |  |  |
| 237    | 66     | 9881.334              | 19.748       | 183605.886 | 52716.096 | 1.121 | 0.210 | 0.705  | 5.338 | 6       |  |  |
| 238    | 14     | 5299.410              | 15.793       | 87545.139  | 25300.033 | 2.158 | 0.452 | 0.254  | 4.774 | 5       |  |  |
| 239    | 30     | 5037.216              | 9.580        | 63000.454  | 16936.159 | 1.366 | 0.406 | 0.435  | 3.365 | 3       |  |  |
| 240    | 35     | 7351.934              | 12.077       | 87210.479  | 24535.665 | 1.005 | 0.301 | 0.696  | 3.339 | 3       |  |  |
| 243    | 71     | 11434.755             | 28.232       | 288643.287 | 80887.441 | 1.797 | 0.254 | 0.415  | 7.075 | 8       |  |  |
| 244    | 37     | 8821.691              | 10.486       | 113758.304 | 28939.135 | 0.753 | 0.229 | 1.024  | 3.288 | 3       |  |  |
| 245    | 44     | 17167.917             | 17.845       | 272252.685 | 78020.807 | 1.139 | 0.251 | 0.658  | 4.538 | 5       |  |  |
| 247    | 30     | 4113.856              | 11.797       | 69864.336  | 19495.226 | 1.558 | 0.329 | 0.431  | 4.736 | 3       |  |  |
| 250    | 85     | 9405.132              | 6.827        | 95089.145  | 26822.267 | 0.759 | 0.266 | 0.967  | 2.853 | 2       |  |  |
| 251    | 5      | 1793.455              | 14.180       | 29216.454  | 7657.781  | 0.370 | 0.087 | 2.468  | 4.253 | 4       |  |  |
| 252    | 28     | 7293.107              | 15.604       | 148299.569 | 42048.034 | 2.131 | 0.370 | 0.296  | 5.759 | 4       |  |  |
| 253    | 43     | 9957.664              | 10.177       | 122806.301 | 31813.780 | 1.177 | 0.368 | 0.537  | 3.198 | 3       |  |  |
| 254    | 61     | 8357.308              | 17.311       | 135994.596 | 38748.881 | 1.174 | 0.253 | 0.636  | 4.640 | 5       |  |  |
| 255    | 13     | 1636.686              | 7.369        | 13111.448  | 3416.143  | 0.338 | 0.162 | 2.479  | 2.086 | 2       |  |  |
| 258    | 6      | 2245.095              | 5.083        | 11190.453  | 2635.750  | 0.093 | 0.079 | 9.903  | 1.177 | 1       |  |  |
| 262    | 27     | 2550.963              | 7.189        | 22410.418  | 6477.178  | 0.747 | 0.294 | 0.945  | 2.541 | 2       |  |  |
| 263    | 16     | 3333.182              | 10.044       | 43518.601  | 12176.314 | 1.104 | 0.302 | 0.632  | 3.656 | 3       |  |  |
| 265    | 25     | 5510.725              | 7.572        | 49026.755  | 13221.181 | 0.603 | 0.251 | 1.242  | 2.402 | 2       |  |  |
| 268    | 31     | 2962.639              | 7.623        | 30774.620  | 8640.610  | 1.002 | 0.344 | 0.655  | 2.913 | 2       |  |  |
| 269    | 38     | 3454.925              | 6.152        | 24422.750  | 6610.845  | 0.373 | 0.195 | 2.158  | 1.913 | 2       |  |  |
| 271    | 20     | 4748.735              | 11.375       | 47934.361  | 12618.220 | 0.845 | 0.318 | 0.807  | 2.657 | 3       |  |  |
| 272    | 7      | 1471.203              | 7.986        | 13778.948  | 3582.696  | 0.380 | 0.156 | 2.221  | 2.436 | 2       |  |  |
| 273    | 19     | 6866.809              | 13.868       | 111292.103 | 31666.611 | 2.253 | 0.489 | 0.227  | 4.607 | 4       |  |  |
| 274    | 33     | 5359.352              | 10.385       | 64877.397  | 18261.557 | 1.405 | 0.412 | 0.419  | 3.410 | 3       |  |  |
| 277    | 29     | 12932.648             | 8.972        | 107220.883 | 32171.095 | 1.058 | 0.425 | 0.543  | 2.489 | 3       |  |  |
| 279    | 37     | 9242.071              | 21.914       | 194438.445 | 54790.519 | 3.753 | 0.633 | 0.098  | 5.929 | 6       |  |  |
| 280    | 16     | 2709.960              | 6.269        | 19554.027  | 5289.924  | 0.628 | 0.322 | 1.080  | 1.950 | 2       |  |  |
| 281    | 29     | 4417.486              | 12.083       | 67614.151  | 18739.294 | 1.028 | 0.242 | 0.737  | 4.248 | 3       |  |  |
| 282    | 46     | 14741.659             | 7.583        | 118215.598 | 32620.940 | 0.915 | 0.413 | 0.642  | 2.215 | 2       |  |  |
| 283    | 55     | 14434.567             | 6.905        | 143218.142 | 39340.273 | 0.797 | 0.292 | 0.888  | 2.729 | 2       |  |  |
| 284    | 18     | 4601.823              | 9.928        | 64006.662  | 18450.967 | 1.421 | 0.355 | 0.454  | 4.003 | 3       |  |  |
| 285    | 16     | 2836.401              | 14.938       | 48399.826  | 13907.695 | 1.692 | 0.345 | 0.387  | 4.904 | 4       |  |  |
